1 **Research article**

2  
3 **Invasion of the stigma by the pollen tube or an oomycete pathogen:**  
4 **striking similarities and differences**

5 **Lucie Riglet<sup>1,2</sup>, Sophie Hok<sup>3</sup>, Naïma Kebdani-Minet<sup>3</sup>, Joëlle Le Berre<sup>3</sup>, Mathieu Gourgues<sup>3,4</sup>**  
6 **Frédérique Rozier<sup>1</sup>, Vincent Bayle<sup>1</sup>, Lesli Bancel-Vallée<sup>5,6</sup>, Valérie Allasia<sup>3</sup>, Harald Keller<sup>3</sup>,**  
7 **Martine Da Rocha<sup>3</sup>, Thierry Gaude<sup>1</sup>, Agnès Attard<sup>3\*</sup> and Isabelle Fobis-Loisy<sup>1\*</sup>**

8 1 Laboratoire Reproduction et Développement des Plantes, Univ Lyon, ENS de Lyon, UCB Lyon1, CNRS, INRA, F-69342 Lyon,  
9 France

10 2 Present Address: Sainsbury Laboratory, University of Cambridge, Cambridge, United Kingdom

11 3 INRAE, CNRS, Université Côte d'Azur, UMR1355-7254, ISA, 06903 Sophia Antipolis, France

12 4 Present Address: Bayer Crop Science France, 14, impasse Pierre Baizet CS 99163, F-69263 Lyon, France

13 5 Unité de Bordeaux, Bordeaux Imaging Center, 146 rue Léo Saignat CS 61292, F-33076 Bordeaux.

14 6 Present Address: Carl Zeiss SAS, 15 avenue Edouard Belin, F-92500 Rueil-Malmaison, France

15  
16 \* Authors for Correspondence: IFL : [isabelle.fobis-loisy@ens-lyon.fr](mailto:isabelle.fobis-loisy@ens-lyon.fr); AA: [agnes.attard@inrae.fr](mailto:agnes.attard@inrae.fr).

17  
18  
19 **Running title : Stigmatic cell response to invader penetration**

20  
21 **Abstract**

22 The epidermis is the first barrier that protects organisms from surrounding stresses. Similar to the  
23 hyphae of filamentous pathogens that penetrate and invade the outer tissues of the host, the pollen  
24 germinates and grows a tube within epidermal cells of the stigma. Early responses of the epidermal  
25 layer are therefore decisive for the outcome of these two-cell interaction processes. Here, we aim at  
26 characterizing and comparing how the papillae of the stigma respond to intrusion attempts, either by  
27 hypha of the hemibiotrophic oomycete root pathogen, *Phytophthora parasitica* or by the pollen tube.  
28 We found that *P. parasitica* spores attach to the papillae and hyphae subsequently invade the entire  
29 pistil. Using transmission electron microscopy, we examined in detail the invasive growth  
30 characteristics of *P. parasitica* and found that the hypha passed through the stigmatic cell wall to grow  
31 in contact with the plasma membrane, contrary to the pollen tube that advanced engulfed within the  
32 two cell wall layers of the papilla. Further quantitative image analysis revealed that the pathogen and  
33 the pollen tube trigger reorganization of the endomembrane system (trans Golgi network, late  
34 endosome) and the actin cytoskeleton. Some of these remodeling processes are common to both  
35 invaders, while others appear to be more specific showing that the stigmatic cells trigger an  
36 appropriate response to the invading structure and somehow can recognize the invader that attempts  
37 to penetrate.

38  
39 **Introduction**

40 The epidermis is the outermost cell layer of plants that is in direct contact with the environment.  
41 epidermal cells have to promptly react to mediate the most relevant responses. Invaders can be  
42 infection structures such as hyphae of fungi or oomycetes but also reproductive structures like pollen  
43 tubes. The first contact between infection hyphae and epidermal cells is decisive for the outcome of  
44 the interaction: disease or resistance. Similarly, the first interaction that occurs between invading  
45 pollen tubes and the epidermal cells of the stigma (papillae) is crucial for successful reproduction. In  
46 both cases, a fine-tuned dialog is established at early stages of the interaction between the host and  
47 the invader and is critical for the result of these two cell-cell interaction systems.

48 Many points of convergence between pathogen defense and pollen recognition have already led  
49 some authors to suggest that the two processes share common origins (Nasrallah, 2005; Kodera et

50 al., 2021). Briefly, (i) the fungal/oomycete hyphae and the pollen tube are tip growing cells that secrete  
51 cell wall-degrading enzymes to weaken and penetrate the host surface layer (Chapman and Goring,  
52 2010; Kebdani et al., 2010; Blackman et al., 2014), (ii) subcellular reorganization of organelles and  
53 cytoskeleton occurs in epidermal cells at the penetration sites (Takemoto et al., 2003; Hardham, 2007;  
54 Iwano et al., 2007; Samuel et al., 2009; Samuel et al., 2011), (iii) both hyphae and pollen tubes take  
55 up resources from invaded cells for their growth. Moreover, plant receptor-like kinases are involved in  
56 the two processes, and sometimes can be common. The best example is the Feronia receptor, which  
57 acts as a scaffold for the assembly of the immune-receptor complex and regulates the pathogen-  
58 elicited burst of Reactive Oxygen Species (ROS) (Stegmann et al., 2017). It also controls the changes  
59 of ROS status in stigmatic cells allowing the pollen to germinate a tube (Liu et al., 2021). A  
60 transcriptomic analysis also predicted components of the pattern-triggered immunity to be activated in  
61 the stigma upon pollination (Kodera et al., 2021). Similarly, a study in which the transcriptome of  
62 pollinated pistils was compared to *Fusarium graminearum* infected ones revealed that similar groups  
63 of genes were overexpressed in pistil responding to pollen tubes or hyphae intrusions (Mondragón-  
64 Palomino et al., 2017). This study was conducted at late stage of interaction and is the only one,  
65 involving a common host tissue, the pistil, to compare reproductive and immune responses. So far, a  
66 detailed comparison of the cellular responses to intrusion and early growth of these two types of  
67 invasive organisms has never been carried out. Here, we identified the *A. thaliana* stigma as a  
68 common “host” for supporting pollen tube growth and infection with an oomycete pathogen. We show  
69 that *Phytophthora parasitica*, a hemibiotrophic telluric pathogen, attaches to and penetrates the  
70 papillae of the stigmatic epidermis before colonizing the entire pistil. Using transmission electron  
71 microscopy (TEM), we examined the invasive growth features of *P. parasitica* within the papillae and  
72 compared them with those of the pollen tube. Using Arabidopsis lines expressing fluorescent tagged-  
73 proteins for subcellular localisation studies, we found that both pathogen and pollen tube trigger  
74 cytoskeletal and endomembrane reorganization following intrusion. Taken together, our results show  
75 that stigma cells respond to *P. parasitica* invasion in a manner similar to plant cells that are natural  
76 targets of oomycete infection, and that some features are different from the stigma cell response to  
77 pollen tube invasion.

## 78 Results

### 80 *P. parasitica*, but not *H. arabidopsidis* colonizes the pistil

81 To investigate whether oomycete pathogens are able to break the stigmatic barrier and infect  
82 *Arabidopsis thaliana* pistils, we selected two oomycete species from different genera with different life  
83 styles and host ranges. *P. parasitica*, is a hemibiotrophic root pathogen with a wide host range  
84 including *A. thaliana* (Attard et al., 2010) and *Hyaloperonospora arabidopsidis*, is an obligate  
85 biotrophic foliar pathogen with *A. thaliana* as its sole host. On their natural host organs, both  
86 oomycetes penetrate within the first four hours after infection (hai). Mobile zoospores and immobile  
87 conidiospores from *P. parasitica* (Figure 1A) and *Hpa* (Figure 1B), respectively, emit a germ tube on  
88 the plant surface that forms a swelling structure (appressorium) dedicated to breach the epidermis  
89 through a penetrating hypha (Attard et al., 2010; Kebdani et al., 2010; Boevink et al., 2020).

90 We applied conidiospores of *H. arabidopsidis* to the stigma by gently rubbing Arabidopsis leaves  
91 with sporulating conidiophores over the pistil surface from late stage 12 floral buds (before anthesis,  
92 Smyth et al., 1990). Four hours after inoculation, spores started to germinate a germ tube that grew  
93 around papillae (Figure 2A) but no appressorium were observed, suggesting that *H. arabidopsidis*  
94 does not manage to penetrate the stigma epidermis. *P. parasitica* produces zoospores that are motile  
95 and swim towards roots under natural conditions. To infect pistil tissues, we dipped either entire flower  
96 buds or naked pistils into a suspension of motile zoospores from a *P. parasitica* strain, which  
97 conditionally expresses a Green Fluorescent Protein and  $\beta$ -glucuronidase (GFP:GUS) fusion protein  
98 upon zoospore germination with an expression level highly increasing during penetration of plant  
99 tissue (Attard et al., 2014). In both cases, zoospores preferentially accumulated at the stigma surface  
100 and penetrate the papillae, as revealed by the high expression of the GUS reporter (Figure 2, B and  
101 C). A preference for specific host tissues is also observed on roots, where zoospores expressing the

102 GUS reporter aggregate around the elongation zone (Figure 2D). Twenty-four hours after infection, we  
103 observed GFP-labeled *P. parasitica* hyphae penetrating the pistil (Figure 2E). In contrast to pollen  
104 tubes, whose elongation was restricted to the central transmitting tract (Figure 2F), *P. parasitica*  
105 hyphae invaded the entire pistil body. Our observations show that the root pathogen *P. parasitica*  
106 (contrary to the leaf pathogen *H. arabidopsidis*) is able to overcome the stigmatic barrier and invade  
107 the pistil, although the stigmatic epidermis is not its natural host tissue.

108

### 109 *P. parasitica* forms appressoria for penetration and induces a PM-derived membrane around 110 the invading hyphae

111 To further characterize *P. parasitica* infection, we compared the early stages of infection occurring at  
112 the epidermis of stigma and roots. One hour after pistil inoculation, zoospores developed a germ tube  
113 that grew on the papilla surface (Figure 3A). At the extremity of this germ tube a swelling  
114 appressorium-like structure is formed (white arrow head) and penetrating hyphae grew into the papilla  
115 cells (Figure 3B). We used an Arabidopsis line expressing the GFP-tagged plasma membrane (PM)  
116 marker LTI6b in stigma (Rozier et al., 2020) to monitor papilla PM remodeling during infection. Four  
117 hours, a LTI6b-labeled membrane enclosed the invading *P. parasitica* hypha (Figure 3, C-E). Because  
118 little is known about the behavior of the PM in epidermal root cells invaded by *P. parasitica*, we  
119 examined the fate of the PM in root cells that undergo hyphal penetration using an Arabidopsis line  
120 expressing the RFP-tagged PM aquaporin AtPIP2A in root. Similar to what has been observed on the  
121 stigma zoospores at the root epidermis emitted a germ tube, formed an appressorium to penetrate the  
122 host epidermis and entered the cells (Figure 3, F-H). Inside the cells, a structure labeled with the PM  
123 marker encased the penetrating hyphae (Figure 3, I-K). Taken together, our observations suggest that  
124 *P. parasitica* uses comparable infection processes to invade papillae and root cells.

125

### 126 Different mechanisms for penetration of stigmatic cells by pollen tube or infectious hyphae

127 To better analyze the invader/host cell interface, we performed TEM analyses. Three hours after  
128 inoculation with *P. parasitica*, the stigma cuticle and the stigma cell wall (CW) were not visible  
129 anymore beneath the appressorium-like structure at the papilla surface (Figure 4, A and C), strongly  
130 suggesting that both layers have been digested at the penetration site. Inside the papilla, the hypha  
131 was found between the cuticle and the CW with the stigmatic CW partially digested (Figure 4, A-D) or  
132 totally embedded in the stigmatic cytoplasm (Figure 4E). Because cell penetration is not synchronous,  
133 we assume that gradual CW digestion from partial (Figure 4C) to complete (Figure 4E) might  
134 correspond to different stages of infection.

135 We then compared the infection process of stigma with natural root infection. Three hours, the root  
136 CW was digested beneath the appressorium at penetration sites (Figure 4, F and G). As previously  
137 observed for infected papillae, we found *P. parasitica* hyphae embedded in the root cell cytoplasm  
138 (Figure 4H).

139 Similarly, we compared papilla infection with pollination. Rapidly after a compatible pollen grain  
140 comes in contact with a stigmatic cell, proteins and lipids from both cell surfaces fused to form a  
141 hydrophilic environment (called the foot) essential for pollen acceptance (Figure 1C; Chapman and  
142 Goring, 2010). This contact is followed by pollen hydration and emission of a pollen tube (germination)  
143 that invades the stigmatic cell to grow towards the stigma basis (Figure 1C). When analyzing papilla  
144 cells by TEM, we found that the pollen tube breached the cuticle layer 30 minutes after pollination  
145 (map, Figure 5, A and B). In contrast to hyphal penetration, we did not observe a complete digestion of  
146 the stigmatic CW by the pollen tube. Rather, the pollen tube grew between the inner and outer CW  
147 layers of the papillae (Figure 1C, Figure 5, C-E). This form of invasive pollen tube growth appears to  
148 be characteristic for *Brassicaceae* species (Riglet et al., 2020).

149 Taken together, we found that oomycete hyphae and pollen tubes both penetrate the papilla  
150 cuticle. Subsequent growth characteristics depend on different mechanisms mobilized regarding  
151 digestion of the stigmatic CW. While the pollen tube is engulfed within the CW, oomycete hyphae  
152 digest the two CW layers to grow in contact with the papilla PM.

153

## 154 Penetration causes different constraints to the papilla surface

155 To invade a plant tissue, an advancing cell has to exert a pressure on its host (Sanati Nezhad and  
156 Geitmann, 2013). To evaluate the mechanical force applied by the invader as it progresses along the  
157 stigmatic cells, we quantified papilla deformations induced by hyphae or pollen tubes early after  
158 penetration. According to Riglet et al., (2020) two measures were considered: (i) the deformation  
159 towards the interior of the papilla (intD), estimated by invagination of the stigmatic PM labeled with the  
160 membrane marker LTI6B-GFP and (ii) the deformation towards the exterior of the papilla (extD)  
161 estimated on bright field images (Figure 6, A and B). We found that the *P. parasitica* hypha creates a  
162 large external deformation during penetration (2.8  $\mu\text{m}$ , Figure 6C, Supplemental Table S1) and slightly  
163 deforms the papilla interior (0.6  $\mu\text{m}$ , Figure 6C, Supplemental Table S1). By contrast, pollen tube  
164 growth resulted in almost the same extD and intD (2.1  $\mu\text{m}$  and 1.8  $\mu\text{m}$  respectively; Figure 6C;  
165 Supplemental Table S1). This quantitative difference could be due to invader diameters, since the  
166 pollen tube is significantly larger than the hypha (*i.e.* 4.8  $\mu\text{m}$  and 3.8  $\mu\text{m}$  respectively; Supplemental  
167 Figure S1 A and B; Supplemental Table S1). Although the pollen tube and the hypha pierce and  
168 penetrate the stigmatic surface, they apparently do not distort the papilla cell to the same extent.

169

## 170 Penetration attempts provoke subcellular rearrangements

171 Vesicle trafficking within infected host cells and remodeling of the cytoskeleton is of crucial importance  
172 for plant defense responses (Ruano and Scheuring, 2020; Lu et al., 2023). Similarly, early cellular  
173 events associated with pollen acceptance are polarized secretion (Samuel et al., 2009; Safavian and  
174 Goring, 2013) and actin reorganization (Iwano et al., 2007; Rozier et al., 2020) oriented towards the  
175 pollen grain. We analyzed the trafficking routes and cytoskeletal dynamics triggered in stigmatic cells  
176 upon hyphal or pollen tube intrusion, and focused on (i) the trans-Golgi network (TGN), a compartment  
177 at the crossroad of secretion and endocytosis (Aniento et al., 2022), (ii) the late endosome (LE), also  
178 named multivesicular bodies (MVB), a compartment that passes cargo to the lytic vacuole but can also  
179 function in polarized secretion by releasing its internal vesicles in the extracellular space (Aniento et  
180 al., 2022), and (iii) the actin network that provides tracks to drive vesicular transport (Geitmann and  
181 Nebenführ, 2015). We followed the fate of these cellular components with specific marker lines  
182 expressing a GFP-tagged vacuolar ATPase  $\alpha 1$  subunit (VHAa1-GFP), a GFP-tagged tandem FYVE  
183 domain (GFP-FYVE) and a fusion between the Lifeact peptide and the Venus fluorochrome (Lifeact-  
184 Venus), respectively. To observe early penetration stages, pistils were inoculated with *P. parasitica* for  
185 one hour or pollinated for 30 minutes and cellular component dynamics was monitored by confocal  
186 microscopy. We quantified the intensity of the fluorescence signal in the papilla around the invader  
187 penetration site using a homemade Fiji macro. We calculated a difference of fluorescence intensity  
188 between the invader penetration site (contact zone) and the surrounding area where there was no  
189 penetration (surrounding area). A positive difference [contact-surrounding] suggests a focalisation of  
190 the component of interest towards the penetration site. In *P. parasitica*-infected papillae, we detected  
191 a significant increase of the TGN-VHAa1 and LE-FYVE fluorescence at the contact zone with the  
192 growing hyphae (Figure 7,A and B; Supplemental Figures S2 and S3; Supplemental Table S2). LE-  
193 FYVE fluorescence enhanced upon pollen tube intrusion around the penetration site (Figure 7;  
194 Supplemental Figure S4, Supplemental Table S2), while the intensity of TGN-VHAa1 labeling at the  
195 contact zone was not significantly different from the zone without contact (Figure 7; Supplemental  
196 Figure S5; Supplemental Table S2). As control, we did not detect any significant fluorescence variation  
197 in non-infected and non-pollinated papillae (Supplemental Figure S6; Supplemental Table S2). In  
198 stigmatic cells, the actin cytoskeleton formed a network of fine cables homogeneously distributed  
199 along the papillae (Supplemental Figure S6A; Rozier et al., 2020). Upon infection, Lifeact-Venus  
200 fluorescence significantly increased at the contact zone, forming a dense and brightly fluorescent  
201 patch beneath the growing hypha (Figure 7; Supplemental Figure S7; Supplemental Table S2).  
202 Similarly, a significant focal accumulation of actin was detected in pollinated papillae at the contact  
203 zone with the growing pollen tube (Figure 7; Supplemental Figure S8; Supplemental Table S2).

204 Dynamic changes in the endomembrane system and the cytoskeleton are still poorly documented  
205 upon invasion of the natural target for *P. parasitica* infection; we then extended our comparison to the  
206 root epidermis. Similar to infected stigmatic cells, we detected a significant increase of the TGN-

207 VHAa1 and LE-FYVE fluorescence at the contact zone with the growing hyphae in infected root cells  
208 (Figure 8A and B; Supplemental Figures S9 and S10; Supplemental Table S2). Such fluorescence  
209 focalization was not observed in control root cells (Supplemental Figure S11A and B). Our Fiji macro  
210 was not suitable for actin-Lifeact quantification since actin filaments were highly concentrated at the  
211 cortical region of the entire root (asterisk in Figure 8C), possibly masking a focal accumulation at the  
212 contact zone. We then counted the number of images displaying a large actin-Lifeact focalisation  
213 patch at the penetrating hypha tip (red arrow in Figure 8C). The oomycete triggered actin focalization  
214 at the contact zone in 11 infected root cells out of 15 (Supplemental Figure S12), while no such  
215 fluorescent patches were detected in control cells (Supplemental Figure S11C).  
216

## 217 Discussion

218 We aimed at deciphering the response of a single epidermal cell, the papilla, to the intrusion of a  
219 pollen tube or the hypha of pathogenic oomycetes from two genera, *P. parasitica* and *H.*  
220 *arabidopsidis*.

221 Following *P. parasitica* inoculation, we found that swimming zoospores accumulated massively at  
222 the stigma and at the elongation zone of the root, suggesting both zones have common features that  
223 specifically allow zoospore aggregation. The attraction by root exudates of zoospores from several  
224 *Phytophthora* species is not fully elucidated but a wide variety of components, such as carbohydrates,  
225 amino-acids and hormones, have already been identified as attractant cues (Bassani et al., 2020;  
226 Kasteel et al., 2023). *A. thaliana* belongs to a plant family characterized by a dry stigma without  
227 surface exudates (Hiscock and Allen, 2008) suggesting that secreted chemical cues are likely not  
228 responsive for spore aggregation at the stigma surface. Electrostatic forces have been suggested to  
229 function in both interaction systems. Zoospore accumulation correlates with the natural electrostatic  
230 field generated by the root and may explain the asymmetric recruitment of spores (Van West et al.,  
231 2002). Mathematical models predicted that the electric field increased near the extremity of the pistil  
232 as the flower opened and this may participate in the electrodeposition of pollen grains onto the stigma  
233 (Clarke et al., 2017). Although it remains largely unknown how these electrical signals are perceived  
234 by the zoospores or the pollen grains, we can speculate that electrostatic forces may be involved in  
235 the preferential accumulation of *P. parasitica* spores at the stigmatic surface.

236 Once at the epidermis surface, filamentous pathogens form appressoria to penetrate the tissue.  
237 Early after pollen landing, the foot is formed to strengthen pollen adhesion and to loosen the stigmatic  
238 CW to prepare the pollen tube entry (Chapman and Goring, 2010). Thus, both pathogen hypha and  
239 pollen tube require specialized structures to penetrate the epidermis. Thereby, the appressorium-like  
240 structure differentiated by *P. parasitica* at the outer surface of the stigmatic epidermis (Figures 3 and  
241 4) is likely used to rupture the cuticle and the CW allowing entry within the papillae. Filamentous  
242 pathogen appressoria can not only be formed at the host surface but also on many artificial materials  
243 such as glass slides and polycarbonate membranes (Bircher and Hohl, 1997; Gaulin et al., 2002).  
244 These *in vitro* experiments led some authors to suggest that host factors are not essential for  
245 appressorium development. On the other hand, physical and chemical properties of the epidermis,  
246 such as surface hardness, hydrophobicity, wax composition and cutin, are strong triggers for the  
247 formation of appressoria of fungi and oomycetes (Bircher and Hohl, 1997; Ryder et al., 2022). A  
248 hydrophobic cuticle covers the outer surface of the epidermal cell walls of stigma and leaves, but not  
249 of roots (Heizmann et al., 2000; Schreiber, 2010). Despite this, we never observed appressorium  
250 formation by the leaf pathogen *H. arabidopsidis* on stigma (Figure 2). This may indicate that the papilla  
251 either lacks the triggering signals or inhibits the differentiation of *H. arabidopsidis* appressorium.  
252 Alternatively, host range specificities may also determine the capacities to infect different plant organs.  
253 *H. arabidopsidis* is an obligate pathogen, which exclusively infects *A. thaliana* leaves. By contrast, *P.*  
254 *parasitica* infects more than 72 plant species and produces appressoria on root and leaf tissues under  
255 natural conditions (Meng et al., 2014). It is therefore likely that *H. arabidopsidis* depends on specific  
256 host stimuli to differentiate appressoria, whereas *P. parasitica* is less selective and develops  
257 appressoria on various supports, including stigma.

258 To overcome the barrier of the plant CW, filamentous pathogens and pollen grains secrete CW-  
259 degrading enzymes capable of digesting its main polymers (Kubicek et al., 2014; Robinson et al.,  
260 2021). Our TEM analysis of the penetration process (Figures 4 and 5) reveals a major difference  
261 between both invaders regarding their ability to digest the stigmatic CW. Whereas the hypha passes  
262 through the bilayer papilla wall to grow in between the inner face of the CW and the PM, pollen tube  
263 penetration is restricted to the outer wall layer and the tube growth is confined inside the CW. This  
264 suggests that the two papilla wall layers may have different chemical properties and their digestion  
265 would require diverse cocktails of secreted enzymes; *P. parasitica* would secrete enzymes that can  
266 digest both CW layers, whereas pollen have not. Interestingly, heterogeneity of the stigmatic wall has  
267 already been suggested (Riglet et al., 2020). In this work, the authors proposed that inner and outer  
268 layers have different mechanical properties related to the orientation of cellulose microfibril, which has  
269 a strong impact on the pollen tube behavior.

270 Advancing hyphae and pollen tubes and may exert a mechanical force during invasion to  
271 overcome the physical barrier of stigmatic cells. We estimated this compressive force by measuring  
272 the papilla deformation (Figure 6). Surprisingly, we found that the pollen tube, while growing engulfed  
273 within the rigid CW, deforms the interior of the cell, whereas the hypha, which passes through the CW  
274 layers and becomes separated from the cytoplasm only by the stigmatic PM, does it poorly. We may  
275 assume that this difference is related to the magnitude of the forces exerted by the two growing  
276 structures and/or the different resistance forces generated by the papilla, which may depend on the  
277 location or the nature of the invader (Sanati Nezhad and Geitmann, 2013). Hardham and co-workers  
278 showed that touching the surface of the *A. thaliana* cotyledon epidermis with a microneedle produced  
279 a rapid actin focalization at the contact point suggesting that actin reorganization is triggered by  
280 detection of the mechanical pressure exerted by the invader (Hardham et al., 2008). In stigmatic cells  
281 challenged by a hypha or a pollen tube, we detected a similar reorganization of actin around the  
282 penetration site (Figure 7). Although the pollen tube deforms the interior of the cell, likely applying a  
283 stronger pressure compared to the hypha, a threshold value for the physical forces required to  
284 stimulate actin reorganization may have been reached in both interaction systems. Such a mechanical  
285 threshold has been proposed to elicit subcellular reorganization in epidermal cells infected with *H.*  
286 *arabidopsidis* (Branco et al., 2017).

287 Within the cytoplasm of infected roots or stigmatic cells, the growing hypha is surrounded by a  
288 membrane envelope labeled with fluorescent markers localized to the PM in non-infected cells (Figure  
289 3). Such membrane envelope were previously described in *A. thaliana* and rice leaves to surround  
290 hyphae of the hemibiotrophic fungi *Magnaporthe oryzae* or *Colletotrichum higginsianum* upon infection  
291 (Yi and Valent, 2013; Qin et al., 2020). This membrane, called the extra-invasive hyphal membrane  
292 (EIHM), is considered as a typical hallmark for the biotrophic phase, required to escape the plant  
293 recognition system and to uptake nutrients from the host (Oliveira-Garcia and Valent, 2015; Jones et  
294 al., 2021). The EIHM forms a continuum with the plant PM but its composition differs as its content is  
295 modified during infection (Qin et al., 2020). To our knowledge such specialized membrane have never  
296 been reported for pathosystems involving flower pathogens (Brewer and Hammond-Kosack, 2015;  
297 Andargie and Li, 2016; Mondragón-Palomino et al., 2017). The observation of an EIHM-like membrane  
298 in papillae cells infected by *P. parasitica*, suggested that the oomycete developed as a biotroph during  
299 the first hours after infection, as it does in roots. Whether this envelope is a functional interface and  
300 whether its composition differs from the rest of the PM needs further investigation.

301 The mobilization of TGN and LE/MVB vesicles contributes to the defense mechanisms by  
302 delivering defense proteins and antimicrobial compounds to the extracellular space, reinforcing the  
303 CW to prevent pathogen entry and participating in the expansion of the host-derived membrane during  
304 infection (Bozkurt et al., 2015). Thereby, it was not surprising to find VHA-TGN and FYVE-LE  
305 concentrated at the vicinity of *P. parasitica* penetration site in root epidermal cells (Figure 8).  
306 Interestingly, TGN and LE focalisation were also triggered by *P. parasitica* in infected stigma (figure 7).  
307 Thus, the pathogen is capable of manipulating a non-natural target, the papilla, to hijack the host  
308 machinery similarly to what it does in roots. Upon pollination, an intense vesicular trafficking in  
309 stigmatic cells is essential to sustain pollen germination and pollen tube growth. Cargos transported by  
310 the vesicles are poorly known; they may deliver hydration factors, wall-loosening enzymes and other

311 components to facilitate germination of the incoming grain and penetration of the emerging pollen tube  
312 (Doucet et al., 2016). Ultrastructural studies on pollen–stigma interactions in *Brassica napus* identified  
313 LE/MVB fused to the stigmatic PM and release of internal vesicles in the extracellular space adjacent  
314 to the pollen grain (Safavian and Goring, 2013; Indriolo et al., 2014). In pollinated *Arabidopsis* stigma,  
315 instead of LE/MVB, secretory vesicles, likely originated from the TGN, were detected attached to the  
316 stigmatic PM beneath the pollen grain (Safavian and Goring, 2013; Indriolo et al., 2014). In our  
317 experiments performed on *A. thaliana*, we did not detect polarized movement of the TGN-VHAA1  
318 compartments during pollen tube penetration. This discrepancy may be related to the methods used  
319 between the two studies, confocal imaging and fluorescent probes in our case, chemically fixed  
320 material and TEM in Safavian and Goring (2013) and Indriolo *et al.* (2014). Besides, the TGN is a  
321 complex compartment at the interface of the secretory and endocytic pathways, divided into  
322 subdomains or sub-populations (Aniento et al., 2022) and deciphering its implication in pollination  
323 would require additional live-cell imaging with a large collection of fluorescent-tagged markers for  
324 endomembrane compartments. Nevertheless, our study highlighted that LE/MVB trafficking could be  
325 implicated in pollen acceptance in *A.thaliana*, in addition to the conventional secretory pathway  
326 suggested by Goring and colleagues (Safavian and Goring, 2013; Indriolo et al., 2014).

327

328 In conclusion, we identified an epidermal cell that enables the in-depth comparative analysis of how  
329 the same plant cell responds to invading hyphae of a pathogen and to the beneficial process of  
330 pollination. Certain of the subcellular changes triggered in stigmatic cells upon *P. parasitica* infection  
331 are also activated in responses to pollen (LE trafficking and actin remodeling). Our work supports the  
332 long-standing assumption that common or evolutionary related host-encoded functions exist between  
333 plant defense and pollen recognition. Besides, we highlighted cellular events specific for each type of  
334 interaction (TGN mobilization, formation of an EIHM-like membrane) that may be required for an  
335 appropriate response likely depending on the chemical nature of the invader and/or the established  
336 entry strategy (*i.e.* appressorium formation and complete CW digestion vs foot formation and partial  
337 CW digestion). The engulfing of the pollen tube within the stigmatic CW remains quite enigmatic. Little  
338 is known about the composition of the papilla wall, except that the bilayered structure is not found in  
339 other epidermal cells. From our data, it is tempting to speculate that limitation of the CW digestion to  
340 the outer layer and constrained growth of the pollen tube inside the wall, may represent specialized  
341 adaptations to discriminate a pollen tube from an unwanted invasive agent, such as a pathogen. It is  
342 likely that more crosstalks exist between infection and pollination. The interaction system we have  
343 developed may provide a framework for the further exploration of how an epidermal cell senses and  
344 responds to an invader in order to adjust the most relevant responses.

345

## 346 **Materials and methods**

### 347 **Biological material and culture conditions**

348 All *Arabidopsis thaliana* lines were in the Col-0 background and grown in growth chambers under long-  
349 day conditions (16h light/8h dark at 21°C/19°C with a relative humidity around 60%). Three sets of  
350 *Arabidopsis* marker lines were used; (i) For expression in stigmatic cells, we used the Brassica pSLR1  
351 promoter (Rozier et al., 2020). The pSLR1-LTI6b:GFP and the pSLR1-Lifeact:Venus lines were  
352 previously described (Rozier et al., 2020). We used the Gateway® technology (Life Technologies,  
353 USA; <http://www.thermofisher.com>, (Karimi et al., 2002) to generate the pSLR1-GFP:2xFyve  
354 construction. (ii) to control expression in root cells, two ubiquitous promoters, p35S and pUbiquitin10,  
355 were used; these promoters are poorly active in papillae. We generated the p35S-AtPIP2A:RFP  
356 construction in the binary vector, pm-rk (Nelson et al., 2007), using the Gateway® technology. The  
357 pUbiquitin10-Citrine:2xFyve and the pUbiquitin10-Lifeact:YFP lines were previously described  
358 (Simon et al., 2014; Doumane et al., 2021). The pVHAA1-AtVHAA1:GFP line was described previously  
359 (Dettmer et al., 2006); the *VHAA1* promoter is active in both stigmatic and root cells. (iii) The pACT11-  
360 RFP and the pLAT52-GFP lines, expressing a cytoplasmic fluorescent marker in pollen grain and tube,  
361 were previously described (Rotman et al., 2003; Rozier et al., 2020).

362 *P. parasitica* Dastur isolate INRA-310 was maintained in the Phytophthora collection at INRAE, Sophia  
363 Antipolis, France. The growth conditions and zoospores production were previously described  
364 (Galiana et al., 2005). The *P. parasitica* transformant (pCL380-GFP:GUS) expressing a GFP:GUS  
365 fusion protein was previously described (Attard et al., 2014). The *H. arabidopsidis* isolate Noco was  
366 transferred weekly onto the susceptible accession Col-0 as described (Hok et al., 2014). Inoculated  
367 plants were kept in a growth cabinet at 16°C for 6 days with a 12 h photoperiod.

368

### 369 **Oomycetes pathogen assays and histochemical analysis.**

370 Pathogen assays with the *P. parasitica* and *H. arabidopsidis* isolates on roots and leaves, respectively,  
371 were performed as previously described (Hok et al., 2014; Le Berre et al., 2017). To infect pistil tissues  
372 with *H. arabidopsidis*, Arabidopsis leaves with the sporulation oomycete on their surface were gently  
373 rubbing over the pistil surface of manually opened flower buds (late stage 12; Smyth et al., 1990).  
374 Alternatively, spores were applied in solution ( $5 \times 10^5$  zoospores/ml) directly on the stigma surface.  
375 Inoculated pistils were observed by confocal microscopy in a period of 4h to 24h after inoculation.  
376 Manually opened floral buds or naked pistils (late stage 12; Smyth et al., 1990), were dipped in an  
377 aqueous suspension of *P. parasitica* zoospores ( $5 \times 10^5$  zoospores/ml) obtained from the strain  
378 pCL380-GFP:GUS (Attard et al., 2014). In a period of 3h to 24h after infection, the GUS reporter  
379 activity staining in plant tissues was performed as previously described (Hok et al., 2014).

380

### 381 **Pollination assay and aniline blue staining**

382 Pistils (late stage 12; Smyth et al., 1990) were emasculated and pollinated with mature pollen. Six  
383 hours after pollination, stigmas were fixed in acetic acid 10%, ethanol 50% and stained with Aniline  
384 Blue for epifluorescence microscopy observation as previously described (Rozier et al., 2020).

385

### 386 **Transmission Electron microscopy**

387 Pistils (late stage 12; Smyth et al., 1990) were emasculated and inoculated with *P. parasitica* for three  
388 hours or pollinated with mature pollen for 60 minutes. Roots were inoculated with *P. parasitica* for  
389 three hours. Pollinated or inoculated tissues were fixed in a solution containing 2.5% glutaraldehyde  
390 and 2.5% paraformaldehyde in 0.1 M phosphate buffer (pH 7.2) and after four rounds of 30 min  
391 vacuum, they were incubated in fixative for 12 hours at room temperature. Pistils or roots were then  
392 washed in a phosphate buffer and further fixed in 1% osmium tetroxide in 0.1 M phosphate buffer (pH  
393 7.2) for 1.5 hours at room temperature. After rinsing in phosphate buffer and distilled water, samples  
394 were dehydrated through an ethanol series, impregnated in increasing concentrations of SPURR resin  
395 over a period of three days before being polymerized at 70°C for 18 h, sectioned (65 nm sections) and  
396 imaged at 80 kV using an FEI TEM tecnaiSpirit with 4 k x 4 k eagle CCD.

397

### 398 **Confocal Laser Scanning Microscopy (CLSM)**

399 Pistils (late stage 12; Smyth et al., 1990) were emasculated and inoculated with *P. parasitica* for one  
400 hour or pollinated with mature pollen for 30 minutes. Roots were inoculated with *P. parasitica* for one  
401 hour. Pollinated pistils were observed with a Zeiss microscope (Zeiss 800 or AxioObserver Z1  
402 equipped with a spinning disk module) with a 40x objective. Oomycetes infected tissues (stigma or  
403 root) were observed with a Zeiss 880 confocal microscope with a 63x objective. Venus, Citrine, YFP  
404 and GFP were excited at 488 nm and fluorescence detected between 500 and 550 nm. RFP was  
405 excited at 561 nm and fluorescence detected between 550 and 600 nm. Stigmas or roots were imaged  
406 every 0.4  $\mu\text{m}$ , encompassing the entire volume of the stigma or half of the root thickness, using z-  
407 stack confocal protocol. Pictures were taken with detector settings optimized for no pixel saturation.

408

### 409 **Fluorescence quantification.**

410 All image processing, image analysis and fluorescence measurements were done using the  
411 ImageJ/Fiji program (Schindelin et al., 2012).

412 To quantify fluorescence intensity at the contact site with the invader, we used a homemade Fiji  
413 macro. From the serial confocal images, we generated an average intensity projection (Z project). We  
414 manually choose one slide from the stack which corresponds to the focus plan of the contact site with



415 the invader. On this selected slide, we manually drew the stigmatic cell periphery and designated the  
416 invader entry point. Then, we indicated the contact area length (ROI zone Length). From numerous  
417 image observations, we defined this contact area as 16  $\mu\text{m}$  (Supplemental Figure S1 C-E). Next, the  
418 macro automatically depicted two zones, the contact and the surrounding zones, with a series of  
419 circles of fixed diameter (ROI zone thickness set at 2.6  $\mu\text{m}$ ). We estimated that 2.6  $\mu\text{m}$  was an  
420 appropriate dimension compared to the papilla sizes and the contact area length. The contact zone  
421 included five to seven circles depending on its shape (straight or curved). The surrounding zone  
422 contained twice as many circles as the contact zone equally distributed from each side of the contact  
423 area. Fluorescence intensity was measured in each circle by the Fiji script, given as gray values and  
424 reported in an Excel file. The mean fluorescence in contact and surrounding zones was calculated,  
425 then, a fluorescence difference [contact-surrounding] was applied. For control stigmatic cells (non  
426 infected or non pollinated), as there was no invader entry point, we introduced zero for the ROI zone  
427 Length, 2.6  $\mu\text{m}$  for ROI zone thickness and defined an arbitrary contact zone of six circles always  
428 positioned at the same distance from one extremity of the drawn papilla periphery. This Fiji macro is  
429 available on demand.

430 For fluorescence quantification in root cells and vesicular marker lines, we followed the same  
431 procedure except that we manually outlined one root edge. For actin fluorescence, quantification using  
432 the Fiji macro was not possible. We then counted the number of images displaying a large actin  
433 focalization when a fluorescence patch was clearly visible at the contact site with the penetrating  
434 hyphae.

435 Statistical analyses of fluorescence intensity at the contact site with the invaders were based on the  
436 paired sample *t*-test. The statistical analysis was carried out on control and inoculated or pollinated  
437 cells ( $n = 15$ ).

438

#### 439 **Deformation and diameter measurements**

440 Pistils (late stage 12; Smyth et al., 1990) expressing a GFP-tagged PM marker (LTI6b) were  
441 emasculated and inoculated with *P. parasitica* or pollinated with mature pollen. Stigma were observed  
442 under CLSM one hai or 30 map respectively. Internal (IntD) and external (ExtD) papilla deformation  
443 were measured at the penetration site with the invaders as described (Riglet et al., 2020). The  
444 statistical analysis compared IntD and ExtD ( $n = 21$  hyphae, 20 pollen tubes) and were based on  
445 unpaired *t*-test. On the same LTI6bGFP images, we measured two perpendicular diameters of the  
446 hypha or pollen tube and calculated a mean diameter. The statistical analysis compared both  
447 diameters ( $n = 21$  hyphae, 20 pollen tubes) and were based on unpaired *t*-test.

448

#### 449 **Supplemental data**

450 **Supplemental Figure S1.** Invader features.

451 **Supplemental Figure S2.** Pattern of TGN-VHAA1 compartments in stigmatic cells in response to *P.*  
452 *parasitica*.

453 **Supplemental Figure S3.** Pattern of LE-FYVE compartments in stigmatic cells in response to *P.*  
454 *parasitica*.

455 **Supplemental Figure S4.** Pattern of LE-FYVE compartments in stigmatic cells in response to pollen  
456 tubes.

457 **Supplemental Figure S5.** Pattern of TGN-VHAA1 compartments in stigmatic cells in response to  
458 pollen tubes.

459 **Supplemental Figure S6.** Subcellular arrangement of the TGN, the LE, and the actin network in  
460 control stigmatic cells as observed by CLSM.

461 **Supplemental Figure S7.** Pattern of the actin cytoskeleton (Actin-Lifeact) in stigmatic cells upon  
462 infection with *P. parasitica*.

463 **Supplemental Figure S8.** Pattern of the actin cytoskeleton (Actin-Lifeact) in stigmatic cells in  
464 response to pollen tubes.

465 **Supplemental Figure S9.** Pattern of TGN-VHAA1 compartments in root cells in response to *P.*  
466 *parasitica*.

467 **Supplemental Figure S10.** Pattern of LE-FYVE compartments in root cells in response to *P.*  
468 *parasitica*.

469 **Supplemental Figure S11.** Subcellular arrangement of the TGN, the LE, and the actin network in  
470 control root cells, as observed by CLSM.

471 **Supplemental Figure S12 :** Dynamics of the actin cytoskeleton (Actin-Lifeact) in root cells in  
472 response to infection with *P. parasitica*, as analyzed by CLSM at one hai.

473

474

## 475 **Acknowledgments**

476 We thank all the members of the Cell Signaling and Endocytosis (SiCE) group (Laboratoire de  
477 Reproduction et Développement des Plantes, ENS Lyon, France) and the Interactions Plantes-  
478 Oomycètes (IPO) team (Institut Sophia Agrobiotech, Sophia Antipolis, France) for fruitful discussions.  
479 We thank Y. Jaillais for his comments on the manuscript. We thank P. Bolland, A Lacroix, J. Berger  
480 (RDP) for plant care. We thank for the microscopy facility, the “Institut Sophia AgroBiotech”  
481 (PlantBIOs) and the “Institut de Pharmacologie Moléculaire et Cellulaire”, both part of the “Microscopie  
482 Imagerie Cytométrie Côte d’Azur” GIS IBiSA labeled platform, and the PLATIM of the SFR  
483 Biosciences Gerland-Lyon Sud. We thank C. Lionnet at the PLATIM and F. Brau at the “Institut de  
484 Pharmacologie Moléculaire et Cellulaire”. We thank the Bordeaux imaging center for TEM imaging and  
485 analysis.

486

## 487 **Funding**

488 This work was supported by the French Government (National Research Agency, ANR) through Grant  
489 ANR-14-CE11-0021, the "Investments for the Future" LABEX SIGNALIFE program reference ANR-11-  
490 LABX-0028-01.

491

492 Conflict of interest statement. None declared

493

## 494 **Author contribution**

495 LR was responsible for all experiments and analysis performed for pollination. SH developed the  
496 pathosystem for papilla infection and performed the confocal imaging. LBV performed the image  
497 acquisition by SEM. NM performed and analyzed *P. parasitica* root and pistil infections. JL performed  
498 and analyzed *P. parasitica* root infections. VA and HK performed *H. arabidopsidis* leaf and pistil  
499 infections. VB designed the Fiji macro. LR, SH, TG, HK, MG, IFL and AA designed the study; LR, IFL  
500 and AA wrote the manuscript. All the authors contributed to the discussion, reviewed and edited the  
501 manuscript. The authors read and approved the final manuscript.

502

503

504

## 504 **Figure legends**

505 **Figure 1.** Invasion features of *P. parasitica*, *H. arabidopsidis*, and *A. thaliana* pollen tube in root, leaf,  
506 and stigma, respectively.

507 A, Arabidopsis root infected with the oomycete *P. parasitica*. Schematic representations (upper row)  
508 and merged CLSM images between the green channel and bright-field of *P. parasitica* strain pCL380-  
509 GFP:GUS expressing a cytoplasmic GFP marker (lower row). The zoospore (sp) germinates a germ  
510 tube (gt) that grows along the plant surface and forms an appressorium (white arrow head) to  
511 penetrate the epidermis. Penetration starts 30 min after infection (left panel). The penetrating hypha  
512 (ph) grows intercellularly and develops haustoria (ha) (6 hai, right panel). B, Arabidopsis leaf infected  
513 with the oomycete *H. arabidopsidis*. Schematic representations (upper row) and bright-field CLSM  
514 images (lower row). The conidiospore (sp) germinates a germ tube (gt) that grows along the plant  
515 surface and forms an appressorium (white arrow head) to penetrate the epidermis (8 hai, left panel).  
516 The penetrating hypha (ph) grows intercellularly and develops haustoria (ha) (18 hai, right panel). C,

517 Arabidopsis stigma with germinating pollen. Schematic representations (upper row) and merged  
518 CLSM images between green fluorescence and bright-field of a pollen grain and a pollen tube  
519 expressing the GFP marker (pLAT52-GFP Line; lower row). Rapidly after pollen capture, a specific  
520 structure, called the foot (depicted in orange), is formed at the pollen-papilla interface. A pollen tube  
521 (pt) emerges from the grain, passes through the foot and penetrates the papilla CW (dark grey layer)  
522 12 map (left panel). The pollen tube grows inside the papilla CW towards the basis of the stigma (right  
523 panel). Bars represent 10  $\mu$ m.

524

525 **Figure 2.** *P. parasitica* but not *H. arabidopsidis* invades *A. thaliana* pistil.

526 A, *H. arabidopsidis* spores (sp) were deposited on the stigma surface of mature pistils and observed  
527 by CLSM. The upper and lower images are both extracted from the same Z-stack showing a spore  
528 and a germ tube (gt) growing around the papilla cells (s) without penetration, 18 hai. Bars represent 10  
529  $\mu$ m. B and C, The entire flower bud (B) or the naked pistil (C) were dipped in a suspension of GUS-  
530 expressing zoospores of *P. parasitica* (strain pCL380-GFP:GUS) and observed by transmission light  
531 microscopy. Zoospores preferentially attached to the stigma epidermis, three hai. D, *A. thaliana* roots  
532 dipped in a suspension of *P. parasitica* strain pCL380-GFP:GUS and observed by TEM. Zoospores  
533 preferentially attached to the elongation zone of the root, three hai. E, Entire flower buds were dipped  
534 in a suspension of GFP-expressing zoospores of *P. parasitica* and observed by CLSM. Median  
535 longitudinal optical section of the entire pistil. Growing hyphae were detected inside the pistil tissues  
536 24 hai. F, Pollinated pistils stained with aniline blue and observed under epifluorescence microscopy.  
537 Six hours after pollen grain (pg) deposition at the stigma surface, pollen tubes (pt) were present within  
538 the central transmitting track. Bars in B-E represent 100  $\mu$ m. Each experiment was repeated at least  
539 three times.

540

541 **Figure 3.** Appressorium-mediated penetration of the pistil and the root epidermis by *P. parasitica*.

542 A, Transversal optical sections of a zoospore (sp, delimited by a white dashed line) of *P. parasitica*  
543 germinating a germ tube (gt) on the stigmatic cell surface, one hai. The germ tube forms an  
544 appressorium-like structure at its extremity (white arrow head). B, Longitudinal optical sections of *P.*  
545 *parasitica* infecting a papilla cell. The penetrating hypha (ph) emerges from an appressorium (white  
546 arrow head). C, D and E. An inoculated papilla expressing a GFP-tagged PM marker (LTI6b) four hai.  
547 A Lti6b-labeled membrane encircles the penetrating hypha, as observed in bright field (C), green  
548 fluorescence (D) and the merged image (E). F to K, Arabidopsis root expressing a RFP-tagged PM  
549 aquaporin AtPIP2A upon invasion by *P. parasitica*. The roots were dipped in a zoospore suspension  
550 for one hour and the epidermis was analyzed by CLSM. The images show optical sections of the same  
551 infection site, with F, G and H focused on the root (r) surface, and I, J and K on the cell interior. The  
552 zoospore (sp) germinates a germ tube that differentiates an appressorium (white arrow head) to  
553 penetrate between two adjacent cells. Inside the epidermis, the AtPIP2A-labeled membrane surrounds  
554 the penetrating hypha. Left column, bright field, middle column, RFP channel, and right column,  
555 merged channel. Bars represent 10  $\mu$ m. Each experiment was repeated at least three times.

556

557 **Figure 4.** Invasion by *P. parasitica* hypha depends on the host epidermis.

558 A to E, Stigmatic cell infected with *P. parasitica* observed by TEM, three hai. A, The germ tube (gt)  
559 emitted from the zoospore is located outside the papilla (s). The extremity of the germ tube forms an  
560 appressorium-like structure (white arrow head). A penetrating hypha (ph) enters the host cell. B,  
561 Magnification detail depicted by the white square in A showing the stigmatic cuticle (SC; electron  
562 dense black layer) and the stigmatic CW (SCW) digested at the penetration site. The oomycete CW  
563 (OCW) appears as an electron transparent white layer. C, The hypha locates between the stigmatic  
564 cuticle and the stigma CW (SCW). D, Magnification detail depicted by the white square in C showing  
565 the stigmatic CW degradation (degSCW) occurring at the contact area with the hypha. E, *P. parasitica*  
566 penetration hypha (ph) embedded in the stigmatic cytoplasm (s). F to H, Root cells (R) infected with *P.*  
567 *parasitica*, as observed by TEM, three hai. F, An appressorium (white arrowhead) is visible at the root  
568 surface and a penetration hypha (ph) inside the host cell. G, Detailed view depicted by the white

569 square in F showing degradation of the root CW(deg RCW). H, A penetration hypha embedded in the  
570 root cytoplasm. Bars represent 1  $\mu\text{m}$ . Each experiment was repeated at least three times.

571

572 **Figure 5.** The pollen tube grows within the papilla CW.

573 The images show the pollinated stigma as observed by TEM, 60 map, with general and detailed views  
574 in the left and right columns, respectively. A, Transversal section showing the pollen tube (pt)  
575 emerging from a pollen grain (pg) and penetrating a stigmatic cell (s). B, close-up view depicted by the  
576 white square in A shows stigmatic cuticle (SC) digestion underneath the pollen tube. C, The  
577 progressing pollen tube grows between two CW layers of the stigmatic cell (s), the inner layer  
578 (SCW.in) and the outer layer (SCW.out), as indicated in the close-up view (D) depicted by the white  
579 square in C. Cell walls appear as electron transparent white/light grey layers. E, Transversal section of  
580 the pollen tube within the stigmatic CW. F, close-up view depicted by the white square in E, shows the  
581 inner stigmatic I surrounds the pollen tube. PCW, pollen CW. Bars in A and B, represent 2 $\mu\text{m}$  and, in  
582 C to F, 1  $\mu\text{m}$ . Each experiment was repeated at least three times.

583

584 **Figure 6.** Pathogen and pollen tubes apply different mechanical stresses onto the papilla

585 *Arabidopsis* stigma expressing a GFP-tagged PM marker (Lti6b) were infected with *P. parasitica* (A) or  
586 pollinated (B), and observed by CLSM at one hai or 30 map, respectively. To quantify the papilla  
587 deformation, a red line was drawn on merged images (inset) between the two external points of the  
588 deformation. Distances from the red line towards the cuticle (blue line, external deformation, extD) and  
589 towards the cytoplasm (yellow line, internal deformation, intD) were determined. Bars represent 10  $\mu\text{m}$   
590 on the full images and 5  $\mu\text{m}$  on the insets. Sp, spore; pg, pollen grain. C, Quantitative analysis of  
591 external (extD) and internal (intD) papilla deformations upon infection or pollination, for 21 hyphae or  
592 20 pollen tubes. In the plots, the cross corresponds to the mean value. t-test; \*\*\* pVal<0,0005; n.s.,  
593 not significant.

594

595 **Figure 7.** The pathogen and pollen tube trigger both similar and different subcellular rearrangements  
596 upon penetration of stigmatic cells.

597 A, Stigmatic cells from fluorescent marker lines for the trans Golgi network (TGN; TGN-VHAA1), the  
598 late endosome (LE/MVB; LE-Fyve), and the actin network (Actin-Lifeact) were infected with *P.*  
599 *parasitica* or pollinated. CLSM at one hai or 30 map allowed to visualize the papillae (green or yellow  
600 fluorescence) and the invader (bright field for *P. parasitica*, red fluorescence for pollen). The papilla  
601 periphery was manually outlined on the obtained images (white lines), and the Fiji macro automatically  
602 depicted two zones, (i) a contact zone (yellow circles) including the invader entry point (red arrow/red  
603 circle), and (ii) a surrounding zone (green circles). Fluorescence intensities (gray values) were  
604 automatically measured in each circle. Bars represent 10  $\mu\text{m}$ . B, Quantification of fluorescence  
605 intensity differences between zones (i) and (ii). For each interaction, 15 stigmatic cells on at least four  
606 independent stigma were analyzed. In the plots, the cross corresponds to the mean value. Statistical  
607 analysis of fluorescence intensity was based on a paired T-test. \* pVal<0,05; \*\* pVal<0,005; \*\*\*  
608 pVal<0,0005; n.s., not significant. Detailed measurements are shown on supplemental Figures S2 to  
609 S5, S7 and S8.

610

611 **Figure 8.** *P. parasitica* triggers reorganization of subcellular components in root cells.

612 Roots from fluorescent marker lines for the trans Golgi network (TGN; VHAA1), the late endosome  
613 (LE/MVB; 2xFyve), and the actin network (Actin; LifeAct) were infected with *P. parasitica* and analyzed  
614 by CLSM at one hai. A, For the TGN and LE marker lines, fluorescence was quantified using the Fiji  
615 macro as described in Figure 7 to determine fluorescence differences between contact zones and  
616 surrounding zones B, Quantification of fluorescence differences. For each interaction, 15 root cells on  
617 at least 10 independent roots were analyzed. In the plots, the cross corresponds to the mean value.  
618 Statistical analysis of fluorescence intensity was based on a paired T-test; \* pVal<0,05; \*\*\*  
619 pVal<0,0005. Detailed measurements are shown on supplemental Figures S9 and S10. C, The Fiji  
620 macro was not applicable to quantify actin fluorescence, because the high concentration of actin  
621 filaments at the cortical region (asterisk) distorted the quantification of fluorescence. We thus visually

622 determined actin focalization when a fluorescence patch (red arrow, delimited by a red dashed line)  
623 was clearly visible at the contact site with the penetrating hyphae (black arrow). Among 15 root cells  
624 on 12 independent roots we determined a frequency of 11/15 events of actin focalization at  
625 penetration sites (see Supplemental Figure S12). BF, bright field. Bars represent 10  $\mu$ m.

626  
627

## 628 **References**

629 **Andargie M, Li J** (2016) *Arabidopsis thaliana*: A Model Host Plant to Study Plant–Pathogen  
630 Interaction Using Rice False Smut Isolates of *Ustilaginoidea virens*. *Frontiers in Plant Science*  
631 7:

632 **Aniento F, Sánchez de Medina Hernández V, Dagdas Y, Rojas-Pierce M, Russinova E** (2022)  
633 Molecular mechanisms of endomembrane trafficking in plants. *The Plant Cell* **34**: 146–173

634 **Attard A, Evangelisti E, Kebdani-Minet N, Panabières F, Deleury E, Maggio C, Ponchet M,**  
635 **Gourgues M** (2014) Transcriptome dynamics of *Arabidopsis thaliana* root penetration by the  
636 oomycete pathogen *Phytophthora parasitica*. *BMC Genomics* **15**: 538

637 **Attard A, Gourgues M, Callemeyn-Torre N, Keller H** (2010) The immediate activation of defense  
638 responses in *Arabidopsis* roots is not sufficient to prevent *Phytophthora parasitica* infection.  
639 *New Phytologist* **187**: 449–460

640 **Bassani I, Larousse M, Tran QD, Attard A, Galiana E** (2020) *Phytophthora* zoospores: From  
641 perception of environmental signals to inoculum formation on the host-root surface. *Comput*  
642 *Struct Biotechnol J* **18**: 3766–3773

643 **Bircher U, Hohl HR** (1997) Environmental signalling during induction of appressorium formation in  
644 *Phytophthora*. *Mycological Research* **101**: 395–402

645 **Blackman LM, Cullerne DP, Hardham AR** (2014) Bioinformatic characterisation of genes encoding  
646 cell wall degrading enzymes in the *Phytophthora parasitica* genome. *BMC Genomics* **15**: 785

647 **Boevink PC, Birch PRJ, Turnbull D, Whisson SC** (2020) Devastating intimacy: the cell biology of  
648 plant–*Phytophthora* interactions. *New Phytologist* **228**: 445–458

649 **Bozkurt TO, Belhaj K, Dagdas YF, Chaparro-Garcia A, Wu C-H, Cano LM, Kamoun S** (2015)  
650 Rerouting of Plant Late Endocytic Trafficking Toward a Pathogen Interface: Rerouting of  
651 Endocytic Pathway to Pathogen Interface. *Traffic* **16**: 204–226

652 **Branco R, Pearsall E-J, Rundle CA, White RG, Bradby JE, Hardham AR** (2017) Quantifying the plant  
653 actin cytoskeleton response to applied pressure using nanoindentation. *Protoplasma* **254**:  
654 1127–1137

655 **Brewer HC, Hammond-Kosack KE** (2015) Host to a Stranger: *Arabidopsis* and *Fusarium* Ear Blight.  
656 *Trends in Plant Science* **20**: 651–663

657 **Chapman LA, Goring DR** (2010) Pollen-pistil interactions regulating successful fertilization in the  
658 Brassicaceae. *Journal of Experimental Botany* **61**: 1987–1999

- 659 **Clarke D, Morley E, Robert D** (2017) The bee, the flower, and the electric field: electric ecology and  
660 aerial electroreception. *J Comp Physiol A* **203**: 737–748
- 661 **Dettmer J** (2006) Vacuolar H<sup>+</sup>-ATPase Activity Is Required for Endocytic and Secretory Trafficking in  
662 Arabidopsis. *THE PLANT CELL ONLINE* **18**: 715–730
- 663 **Doucet J, Lee HK, Goring DR** (2016) Pollen Acceptance or Rejection: A Tale of Two Pathways. *Trends*  
664 *in Plant Science* **21**: 1058–1067
- 665 **Doumane M, Lebecq A, Colin L, Fangain A, Stevens FD, Bareille J, Hamant O, Belkhadir Y,**  
666 **Munnik T, Jaillais Y, et al** (2021) Inducible depletion of PI(4,5)P<sub>2</sub> by the synthetic iDePP  
667 system in Arabidopsis. *Nat Plants* **7**: 587–597
- 668 **Gaulin E, Jauneau A, Villalba F, Rickauer M, Esquerré-Tugayé M-T, Bottin A** (2002) The CBEL  
669 glycoprotein of *Phytophthora parasitica* var- *nicotianae* is involved in cell wall deposition and  
670 adhesion to cellulosic substrates. *Journal of Cell Science* **115**: 4565–4575
- 671 **Geitmann A, Nebenführ A** (2015) Navigating the plant cell: intracellular transport logistics in the  
672 green kingdom. *MBoC* **26**: 3373–3378
- 673 **Hardham AR** (2007) Cell biology of plant?oomycete interactions. *Cellular Microbiology* **9**: 31–39
- 674 **Hardham AR, Takemoto D, White RG** (2008) Rapid and dynamic subcellular reorganization  
675 following mechanical stimulation of Arabidopsis epidermal cells mimics responses to fungal  
676 and oomycete attack. *BMC Plant Biology* **8**: 63
- 677 **Heizmann P, Luu DT, Dumas C** (2000) Pollen-stigma adhesion in the Brassicaceae. *Annals of Botany*  
678 **85**: 23–27
- 679 **Hiscock SJ, Allen AM** (2008) Diverse cell signalling pathways regulate pollen-stigma interactions: the  
680 search for consensus. *New Phytologist* **179**: 286–317
- 681 **Hok S, Allasia V, Andrio E, Naessens E, Ribes E, Panabières F, Attard A, Ris N, Clément M, Barlet**  
682 **X, et al** (2014) The Receptor Kinase IMPAIRED OOMYCETE SUSCEPTIBILITY1 Attenuates  
683 Abscisic Acid Responses in Arabidopsis1[C][W]. *Plant Physiol* **166**: 1506–1518
- 684 **Indriolo E, Safavian D, Goring DR** (2014) The ARC1 E3 Ligase Promotes Two Different Self-Pollen  
685 Avoidance Traits in Arabidopsis. *The Plant Cell* **26**: 1525–1543
- 686 **Iwano M, Shiba H, Matoba K, Miwa T, Funato M, Entani T, Nakayama P, Shimosato H, Takaoka A,**  
687 **Isogai A, et al** (2007) Actin Dynamics in Papilla Cells of Brassica rapa during Self- and Cross-  
688 Pollination. *PLANT PHYSIOLOGY* **144**: 72–81
- 689 **Jones K, Zhu J, Jenkinson CB, Kim DW, Pfeifer MA, Khang CH** (2021) Disruption of the Interfacial  
690 Membrane Leads to Magnaporthe oryzae Effector Re-location and Lifestyle Switch During  
691 Rice Blast Disease. *Front Cell Dev Biol* **9**: 681734
- 692 **Karimi M, Inzé D, Depicker A** (2002) GATEWAY vectors for Agrobacterium-mediated plant  
693 transformation. *Trends Plant Sci* **7**: 193–195

- 694 **Kasteel M, Ketelaar T, Govers F** (2023) Fatal attraction: How Phytophthora zoospores find their host.  
695 *Seminars in Cell & Developmental Biology*. doi: 10.1016/j.semcdb.2023.01.014
- 696 **Kebdani N, Pieuchot L, Deleury E, Panabières F, Le Berre J-Y, Gourgues M** (2010) Cellular and  
697 molecular characterization of *Phytophthora parasitica* appressorium-mediated penetration.  
698 *New Phytologist* **185**: 248–257
- 699 **Kodera C, Just J, Da Rocha M, Larrieu A, Riglet L, Legrand J, Rozier F, Gaude T, Fobis-Loisy I**  
700 (2021) The molecular signatures of compatible and incompatible pollination in *Arabidopsis*.  
701 *BMC Genomics* **22**: 268
- 702 **Kubicek CP, Starr TL, Glass NL** (2014) Plant Cell Wall-Degrading Enzymes and Their Secretion in  
703 Plant-Pathogenic Fungi. *Annu Rev Phytopathol* **52**: 427–451
- 704 **Le Berre J-Y, Gourgues M, Samans B, Keller H, Panabières F, Attard A** (2017) Transcriptome  
705 dynamic of *Arabidopsis* roots infected with *Phytophthora parasitica* identifies VQ29, a gene  
706 induced during the penetration and involved in the restriction of infection. *PloS one* **12**:  
707 e0190341
- 708 **Liu C, Shen L, Xiao Y, Vyshedsky D, Peng C, Sun X, Liu Z, Cheng L, Zhang H, Han Z, et al** (2021)  
709 Pollen PCP-B peptides unlock a stigma peptide-receptor kinase gating mechanism for  
710 pollination. *Science* **372**: 171–175
- 711 **Lu Y, Zhang Y, Lian N, Li X** (2023) Membrane Dynamics Regulated by Cytoskeleton in Plant  
712 Immunity. *Int J Mol Sci* **24**: 6059
- 713 **Meng Y, Zhang Q, Ding W, Shan W** (2014) *Phytophthora parasitica*: a model oomycete plant pathogen.  
714 *Mycology* **5**: 43–51
- 715 **Mondragón-Palomino M, John-Arputharaj A, Pallmann M, Dresselhaus T** (2017) Similarities  
716 between Reproductive and Immune Pistil Transcriptomes of *Arabidopsis* Species. *Plant*  
717 *Physiology* **174**: 1559–1575
- 718 **Nasrallah J** (2005) Recognition and rejection of self in plant self-incompatibility: comparisons to  
719 animal histocompatibility. *Trends in Immunology* **26**: 412–418
- 720 **Nelson BK, Cai X, Nebenführ A** (2007) A multicolored set of in vivo organelle markers for co-  
721 localization studies in *Arabidopsis* and other plants: Fluorescent organelle markers. *The Plant*  
722 *Journal* **51**: 1126–1136
- 723 **Oliveira-Garcia E, Valent B** (2015) How eukaryotic filamentous pathogens evade plant recognition.  
724 *Current Opinion in Microbiology* **26**: 92–101
- 725 **Qin L, Zhou Z, Li Q, Zhai C, Liu L, Quilichini TD, Gao P, Kessler SA, Jaillais Y, Datla R, et al** (2020)  
726 Specific Recruitment of Phosphoinositide Species to the Plant-Pathogen Interfacial Membrane  
727 Underlies *Arabidopsis* Susceptibility to Fungal Infection. *Plant Cell*. doi: 10.1105/tpc.19.00970
- 728 **Riglet L, Rozier F, Kodera C, Bovio S, Sechet J, Fobis-Loisy I, Gaude T** (2020) KATANIN-dependent  
729 mechanical properties of the stigmatic cell wall mediate the pollen tube path in *Arabidopsis*.  
730 *eLife* **9**: e57282

- 731 **Robinson R, Sollapura V, Couroux P, Sprott D, Ravensdale M, Routly E, Xing T, Robert LS** (2021)  
732 The Brassica mature pollen and stigma proteomes: preparing to meet. *The Plant Journal* **107**:  
733 1546–1568
- 734 **Rotman N, Rozier F, Boavida L, Dumas C, Berger F, Faure J-E** (2003) Female control of male gamete  
735 delivery during fertilization in *Arabidopsis thaliana*. *Current Biology* **13**: 432–436
- 736 **Rozier F, Riglet L, Kodera C, Bayle V, Durand E, Schnabel J, Gaude T, Fobis-Loisy I** (2020) Live-cell  
737 imaging of early events following pollen perception in self-incompatible *Arabidopsis thaliana*.  
738 *J Exp Bot* **71**: 2513–2526
- 739 **Ruano G, Scheuring D** (2020) Plant Cells under Attack: Unconventional Endomembrane Trafficking  
740 during Plant Defense. *Plants* **9**: 389
- 741 **Ryder LS, Cruz-Mireles N, Molinari C, Eisermann I, Eseola AB, Talbot NJ** (2022) The appressorium  
742 at a glance. *Journal of Cell Science* **135**: jcs259857
- 743 **Safavian D, Goring DR** (2013) Secretory Activity Is Rapidly Induced in Stigmatic Papillae by  
744 Compatible Pollen, but Inhibited for Self-Incompatible Pollen in the Brassicaceae. *PLoS ONE*  
745 **8**: e84286
- 746 **Samuel MA, Chong YT, Haasen KE, Aldea-Brydges MG, Stone SL, Goring DR** (2009) Cellular  
747 Pathways Regulating Responses to Compatible and Self-Incompatible Pollen in Brassica and  
748 *Arabidopsis* Stigmas Intersect at Exo70A1, a Putative Component of the Exocyst Complex.  
749 *THE PLANT CELL ONLINE* **21**: 2655–2671
- 750 **Samuel MA, Tang W, Jamshed M, Northey J, Patel D, Smith D, Siu KWM, Muench DG, Wang Z-Y,**  
751 **Goring DR** (2011) Proteomic Analysis of Brassica Stigmatic Proteins Following the Self-  
752 incompatibility Reaction Reveals a Role for Microtubule Dynamics During Pollen Responses.  
753 *Molecular & Cellular Proteomics* **10**: M111.011338-M111.011338
- 754 **Sanati Nezhad A, Geitmann A** (2013) The cellular mechanics of an invasive lifestyle. *Journal of*  
755 *Experimental Botany* **64**: 4709–4728
- 756 **Schindelin J, Arganda-Carreras I, Frise E, Kaynig V, Longair M, Pietzsch T, Preibisch S, Rueden C,**  
757 **Saalfeld S, Schmid B, et al** (2012) Fiji: an open-source platform for biological-image analysis.  
758 *Nat Methods* **9**: 676–682
- 759 **Schreiber L** (2010) Transport barriers made of cutin, suberin and associated waxes. *Trends in Plant*  
760 *Science* **15**: 546–553
- 761 **Simon MLA, Platre MP, Assil S, van Wijk R, Chen WY, Chory J, Dreux M, Munnik T, Jaillais Y**  
762 (2014) A multi-colour/multi-affinity marker set to visualize phosphoinositide dynamics in  
763 *Arabidopsis*. *The Plant Journal* **77**: 322–337
- 764 **Smyth DR, Bowman JL, Meyerowitz EM** (1990) Early flower development in *Arabidopsis*. *The Plant*  
765 *Cell* **2**: 755–767



- 766 **Stegmann M, Monaghan J, Smakowska-Luzan E, Rovenich H, Lehner A, Holton N, Belkhadir Y,**  
767 **Zipfel C** (2017) The receptor kinase FER is a RALF-regulated scaffold controlling plant  
768 immune signaling. *Science* **355**: 287–289
- 769 **Takemoto D, Jones DA, Hardham AR** (2003) GFP-tagging of cell components reveals the dynamics of  
770 subcellular re-organization in response to infection of Arabidopsis by oomycete pathogens.  
771 *The Plant Journal* **33**: 775–792
- 772 **Van West P van, Morris BM, Reid B, Appiah AA, Osborne MC, Campbell TA, Shepherd SJ, Gow**  
773 **NAR** (2002) Oomycete plant pathogens use electric fields to target roots. *Molecular plant-*  
774 *microbe interactions* **15**: 790–798
- 775 **Yi M, Valent B** (2013) Communication Between Filamentous Pathogens and Plants at the Biotrophic  
776 Interface. *Annual Review of Phytopathology* **51**: 587–611
- 777

**Figure 1**

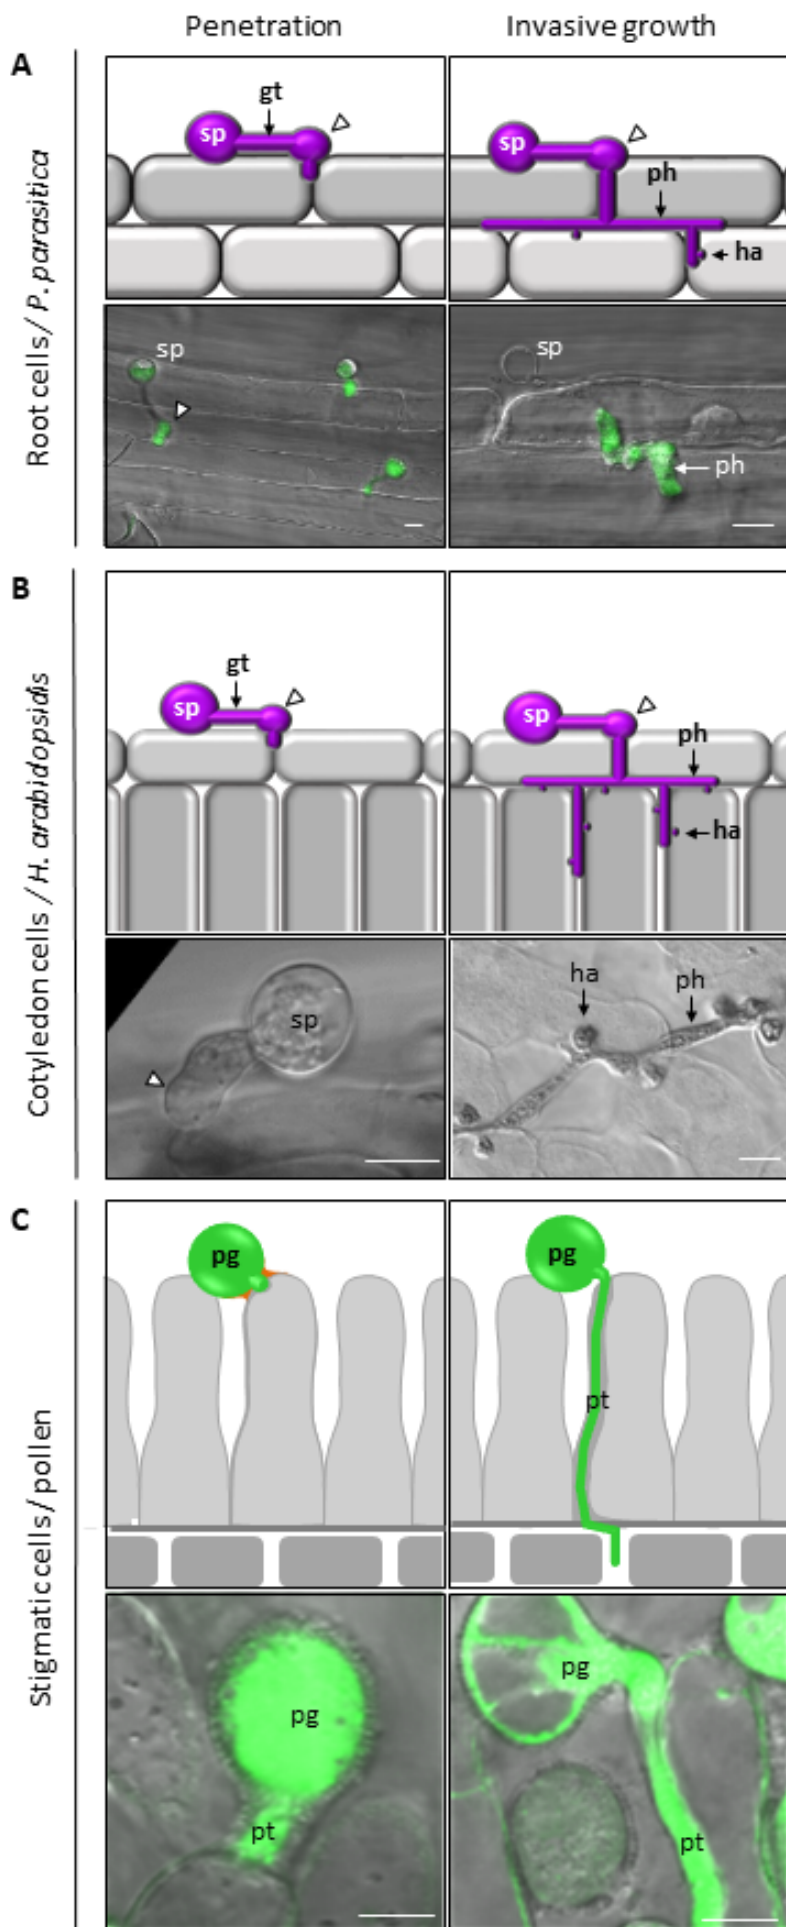

**Figure 1.** Invasion features of *P. parasitica*, *H. arabidopsidis*, and *A. thaliana* pollen tube in root, leaf, and stigma, respectively.

**A**, Arabidopsis root infected with the oomycete *P. parasitica*. Schematic representations (upper row) and merged CLSM images between the green channel and bright-field of *P. parasitica* strain pCL380-GFP:GUS expressing a cytoplasmic GFP marker (lower row). The zoospore (sp) germinates a germ tube (gt) that grows along the plant surface and forms an appressorium (white arrow head) to penetrate the epidermis. Penetration starts 30 min after infection (left panel). The penetrating hypha (ph) grows intercellularly and develops haustoria (ha) (6 hai, right panel).

**B**, Arabidopsis leaf infected with the oomycete *H. arabidopsidis*. Schematic representations (upper row) and bright-field CLSM images (lower row). The conidiospore (sp) germinates a germ tube (gt) that grows along the plant surface and forms an appressorium (white arrow head) to penetrate the epidermis (8 hai, left panel). The penetrating hypha (ph) grows intercellularly and develops haustoria (ha) (18 hai, right panel).

**C**, Arabidopsis stigma with germinating pollen. Schematic representations (upper row) and merged CLSM images between green fluorescence and bright-field of a pollen grain and a pollen tube expressing the GFP marker (pLAT52-GFP Line; lower row). Rapidly after pollen capture, a specific structure, called the foot (depicted in orange), is formed at the pollen-papilla interface. A pollen tube (pt) emerges from the grain, passes through the foot and penetrates the papilla CW (dark grey layer) 12 map (left panel). The pollen tube grows inside the papilla CW towards the basis of the stigma (right panel). Bars represent 10  $\mu$ m.

## Figure 2

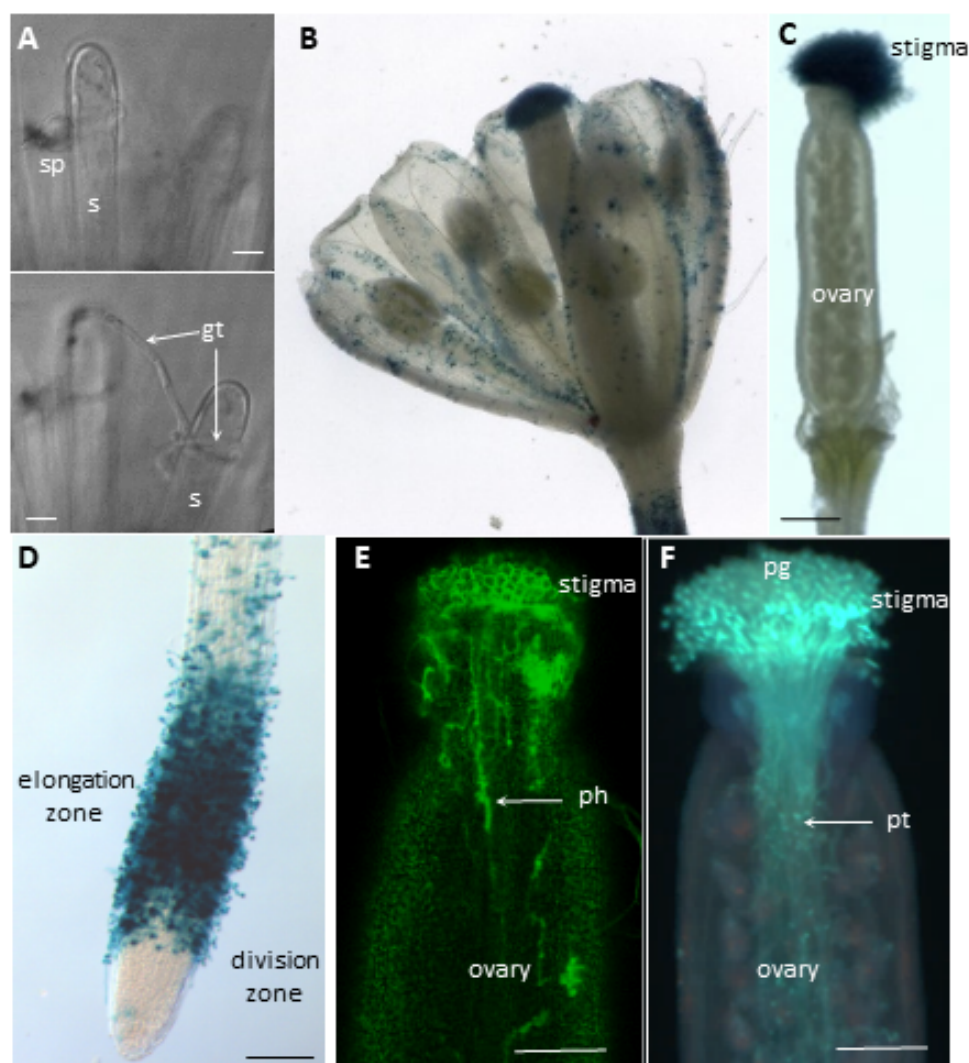

**Figure 2.** *P. parasitica* but not *H. arabidopsis* invades *A. thaliana* pistil.

*A.* *H. arabidopsis* spores (sp) were deposited on the stigma surface of mature pistils and observed by CLSM. The upper and lower images are both extracted from the same Z-stack showing a spore and a germ tube (gt) growing around the papilla cells (s) without penetration, 18 hai. Bars represent 10  $\mu$ m. B and C, The entire flower bud (B) or the naked pistil (C) were dipped in a suspension of GUS-expressing zoospores of *P. parasitica* (strain *pCL380-GFP:GUS*) and observed by transmission light microscopy. Zoospores preferentially attached to the stigma epidermis, three hai. D, *A. thaliana* roots dipped in a suspension of *P. parasitica* strain *pCL380-GFP:GUS* and observed by TEM. Zoospores preferentially attached to the elongation zone of the root, three hai. E, Entire flower buds were dipped in a suspension of GFP-expressing zoospores of *P. parasitica* and observed by CLSM. Median longitudinal optical section of the entire pistil. Growing hyphae were detected inside the pistil tissues 24 hai. F, Pollinated pistils stained with aniline blue and observed under epifluorescence microscopy. Six hours after pollen grain (pg) deposition at the stigma surface, pollen tubes (pt) were present within the central transmitting track. Bars in B-E represent 100  $\mu$ m. Each experiment was repeated at least three times.

### Figure 3

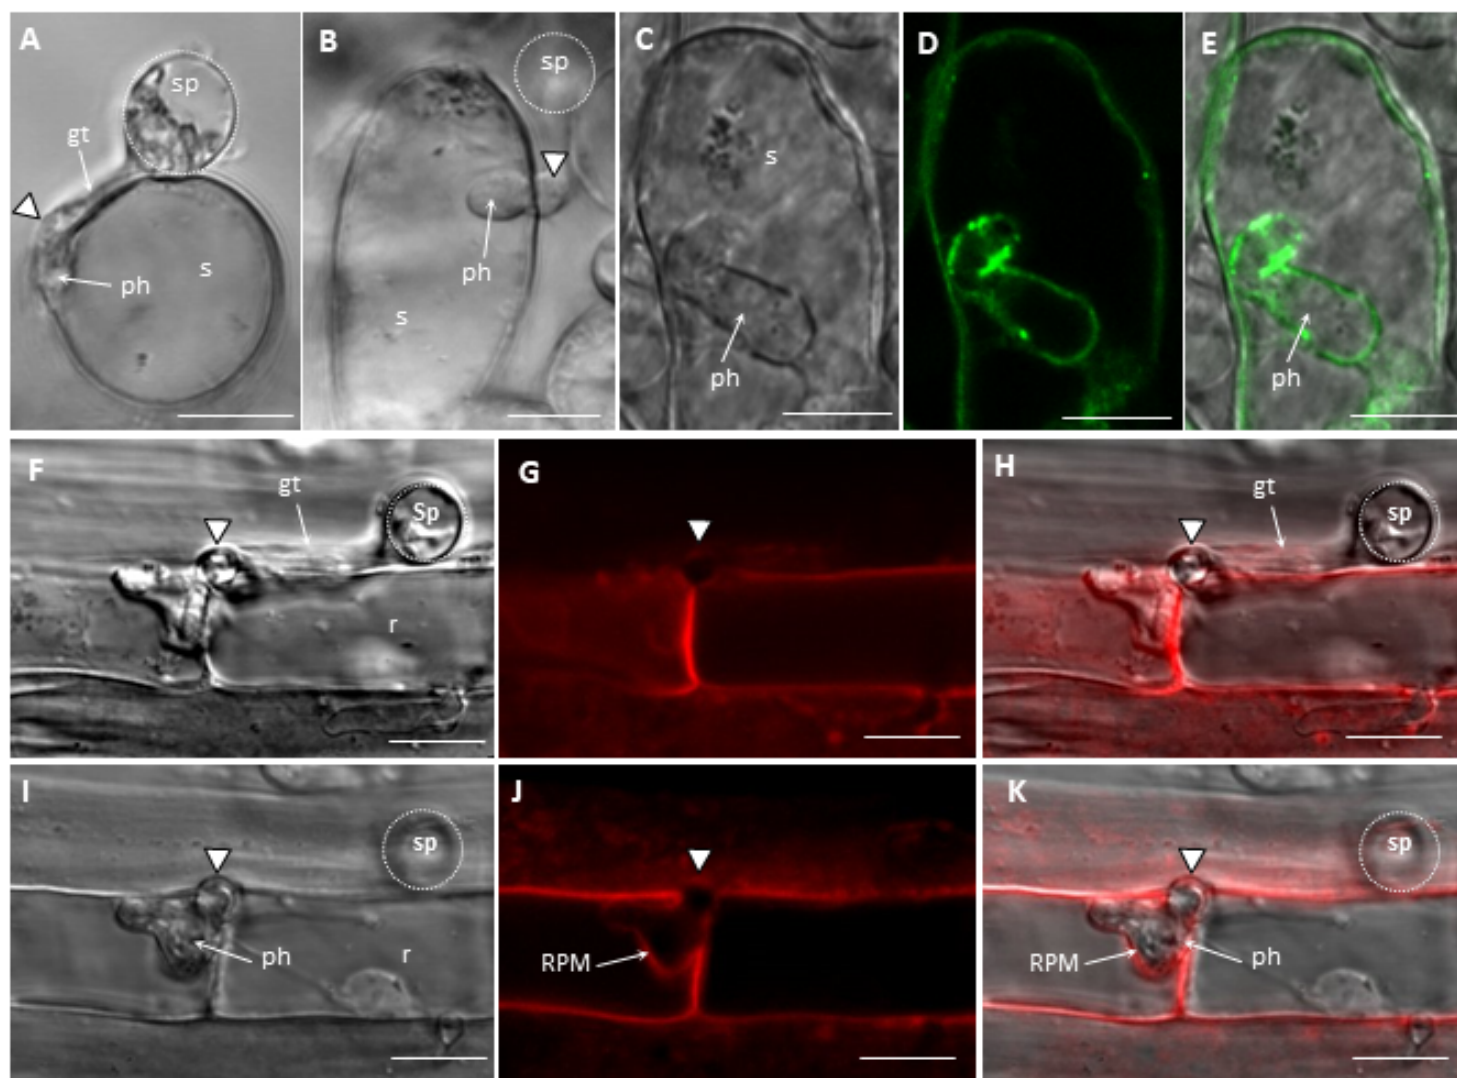

**Figure 3.** Appressorium-mediated penetration of the pistil and the root epidermis by *P. parasitica*.

A, Transversal optical sections of a zoospore (sp, delimited by a white dashed line) of *P. parasitica* germinating a germ tube (gt) on the stigmatic cell surface, one hai. The germ tube forms an appressorium-like structure at its extremity (white arrow head). B, Longitudinal optical sections of *P. parasitica* infecting a papilla cell. The penetrating hypha (ph) emerges from an appressorium (white arrow head). C, D and E. An inoculated papilla expressing a GFP-tagged PM marker (LTI6b) four hai. A Lti6b-labeled membrane encircles the penetrating hypha, as observed in bright field (C), green fluorescence (D) and the merged image (E). F to K, Arabidopsis root expressing a RFP-tagged PM aquaporin AtPIP2A upon invasion by *P. parasitica*. The roots were dipped in a zoospore suspension for one hour and the epidermis was analyzed by CLSM. The images show optical sections of the same infection site, with F, G and H focused on the root (r) surface, and I, J and K on the cell interior. The zoospore (sp) germinates a germ tube that differentiates an appressorium (white arrow head) to penetrate between two adjacent cells. Inside the epidermis, the AtPIP2A-labeled membrane surrounds the penetrating hypha. Left column, bright field, middle column, RFP channel, and right column, merged channel. Bars represent 10  $\mu\text{m}$ . Each experiment was repeated at least three times.

## Figure 4

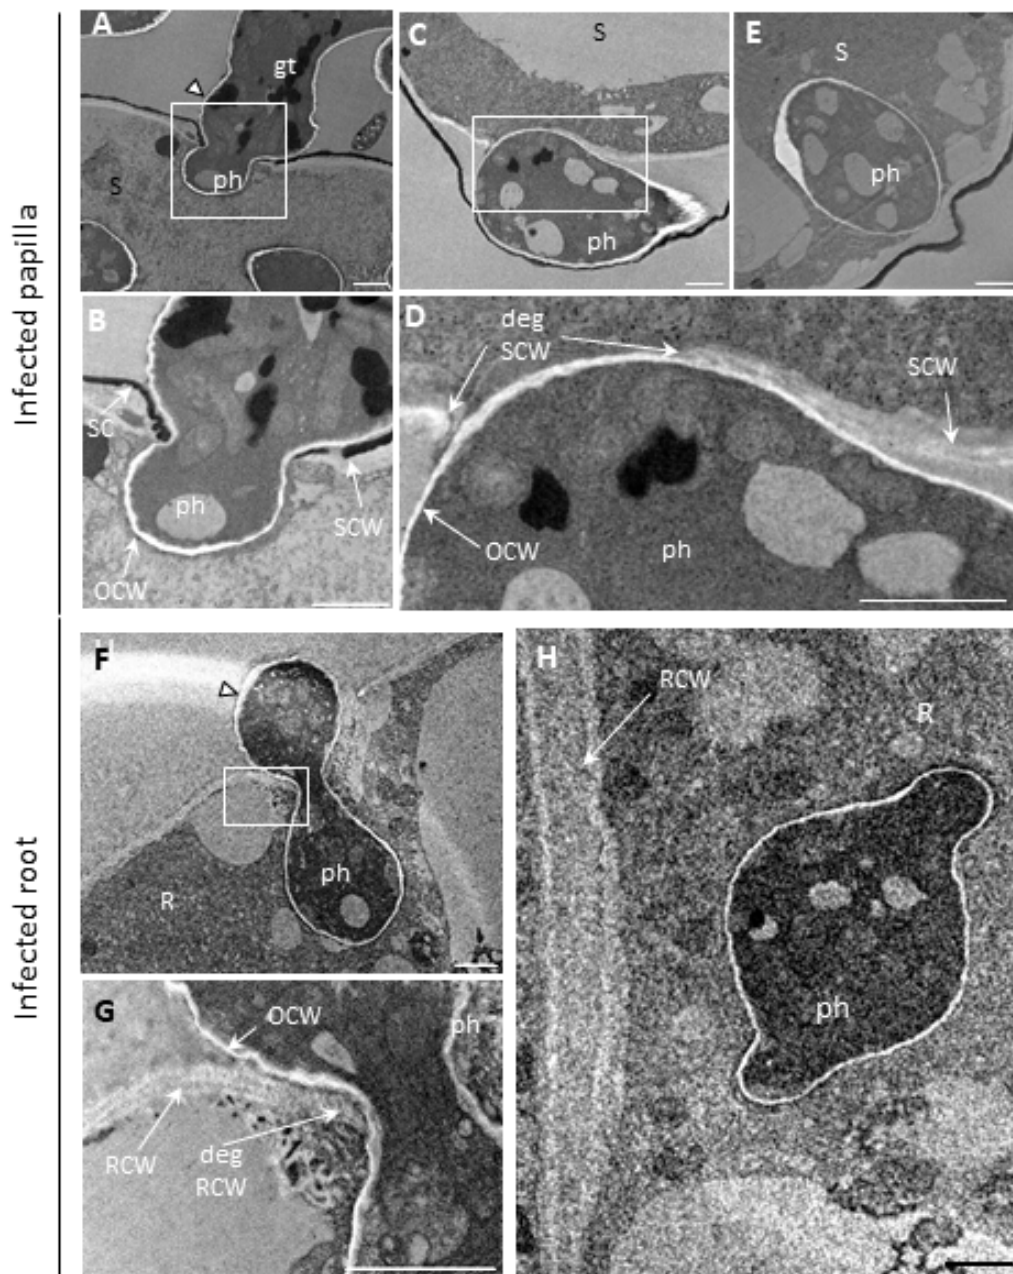

**Figure 4.** Invasion by *P. parasitica* hypha depends on the host epidermis.

A to E, Stigmatic cell infected with *P. parasitica* observed by TEM, three hai. A, The germ tube (gt) emitted from the zoospore is located outside the papilla (s). The extremity of the germ tube forms an appressorium-like structure (white arrow head). A penetrating hypha (ph) enters the host cell. B, Magnification detail depicted by the white square in A showing the stigmatic cuticle (SC; electron dense black layer) and the stigmatic CW (SCW) digested at the penetration site. The oomycete CW (OCW) appears as an electron transparent white layer. C, The hypha locates between the stigmatic cuticle and the stigma CW (SCW). D, Magnification detail depicted by the white square in C showing the stigmatic CW degradation (degSCW) occurring at the contact area with the hypha. E, *P. parasitica* penetration hypha (ph) embedded in the stigmatic cytoplasm (s). F to H, Root cells (R) infected with *P. parasitica*, as observed by TEM, three hai. F, An appressorium (white arrowhead) is visible at the root surface and a penetration hypha (ph) inside the host cell. G, Detailed view depicted by the white square in F showing degradation of the root CW(deg RCW). H, A penetration hypha embedded in the root cytoplasm. Bars represent 1 μm. Each experiment was repeated at least three times.

## Figure 5

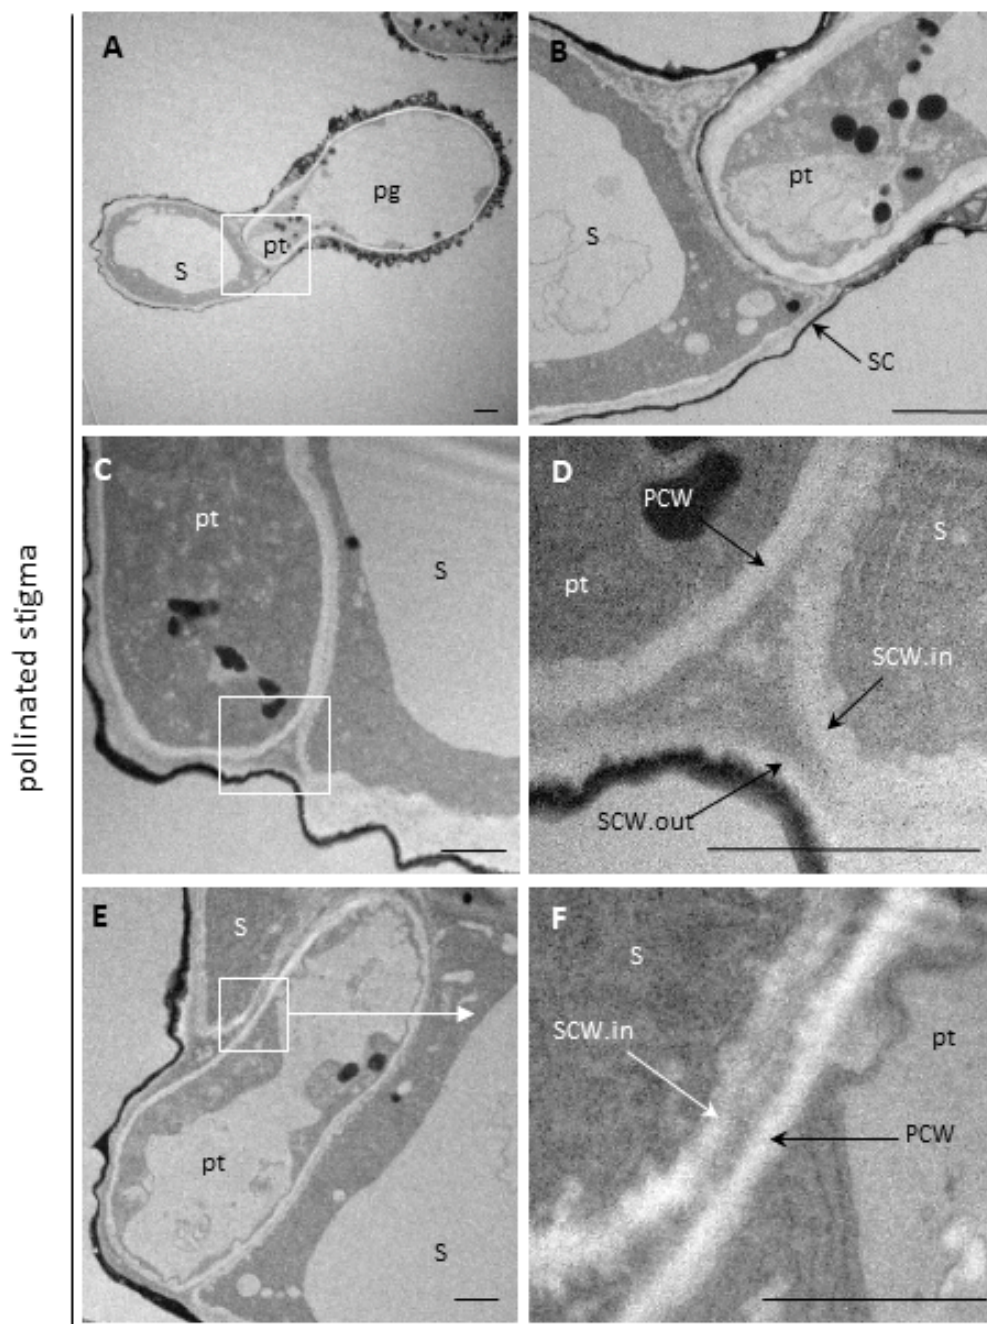

### Figure 5. The pollen tube grows within the papilla CW.

The images show the pollinated stigma as observed by TEM, 60 map, with general and detailed views in the left and right columns, respectively. A, Transversal section showing the pollen tube (pt) emerging from a pollen grain (pg) and penetrating a stigmatic cell (s). B, close-up view depicted by the white square in A shows stigmatic cuticle (SC) digestion underneath the pollen tube. C, The progressing pollen tube grows between two CW layers of the stigmatic cell (s), the inner layer (SCW.in) and the outer layer (SCW.out), as indicated in the close-up view (D) depicted by the white square in C. Cell walls appear as electron transparent white/light grey layers. E, Transversal section of the pollen tube within the stigmatic CW. F, close-up view depicted by the white square in E, shows the inner stigmatic CW surrounds the pollen tube. PCW, pollen CW. Bars in A and B, represent 2 μm and, in C to F, 1 μm. Each experiment was repeated at least three times.

## Figure 6

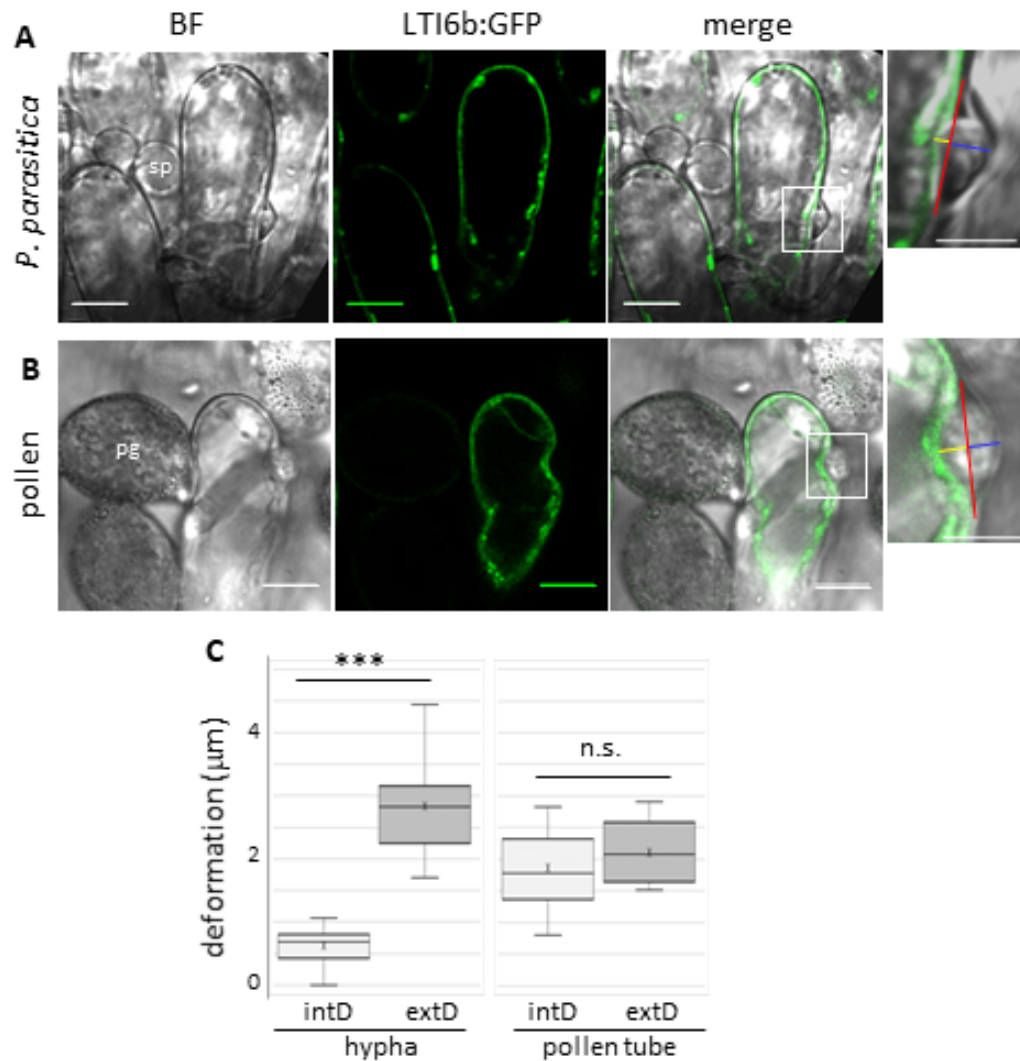

**Figure 6.** Pathogen and pollen tubes apply different mechanical stresses onto the papilla Arabidopsis stigma expressing a GFP-tagged PM marker (Lti6b) were infected with *P. parasitica* (A) or pollinated (B), and observed by CLSM at one hai or 30 map, respectively. To quantify the papilla deformation, a red line was drawn on merged images (inset) between the two external points of the deformation. Distances from the red line towards the cuticle (blue line, external deformation, extD) and towards the cytoplasm (yellow line, internal deformation, intD) were determined. Bars represent 10 μm on the full images and 5 μm on the insets. Sp, spore; pg, pollen grain. C, Quantitative analysis of external (extD) and internal (intD) papilla deformations upon infection or pollination, for 21 hyphae or 20 pollen tubes. In the plots, the cross corresponds to the mean value. t-test; \*\*\* pVal<0,0005; n.s., not significant.

## Figure 7

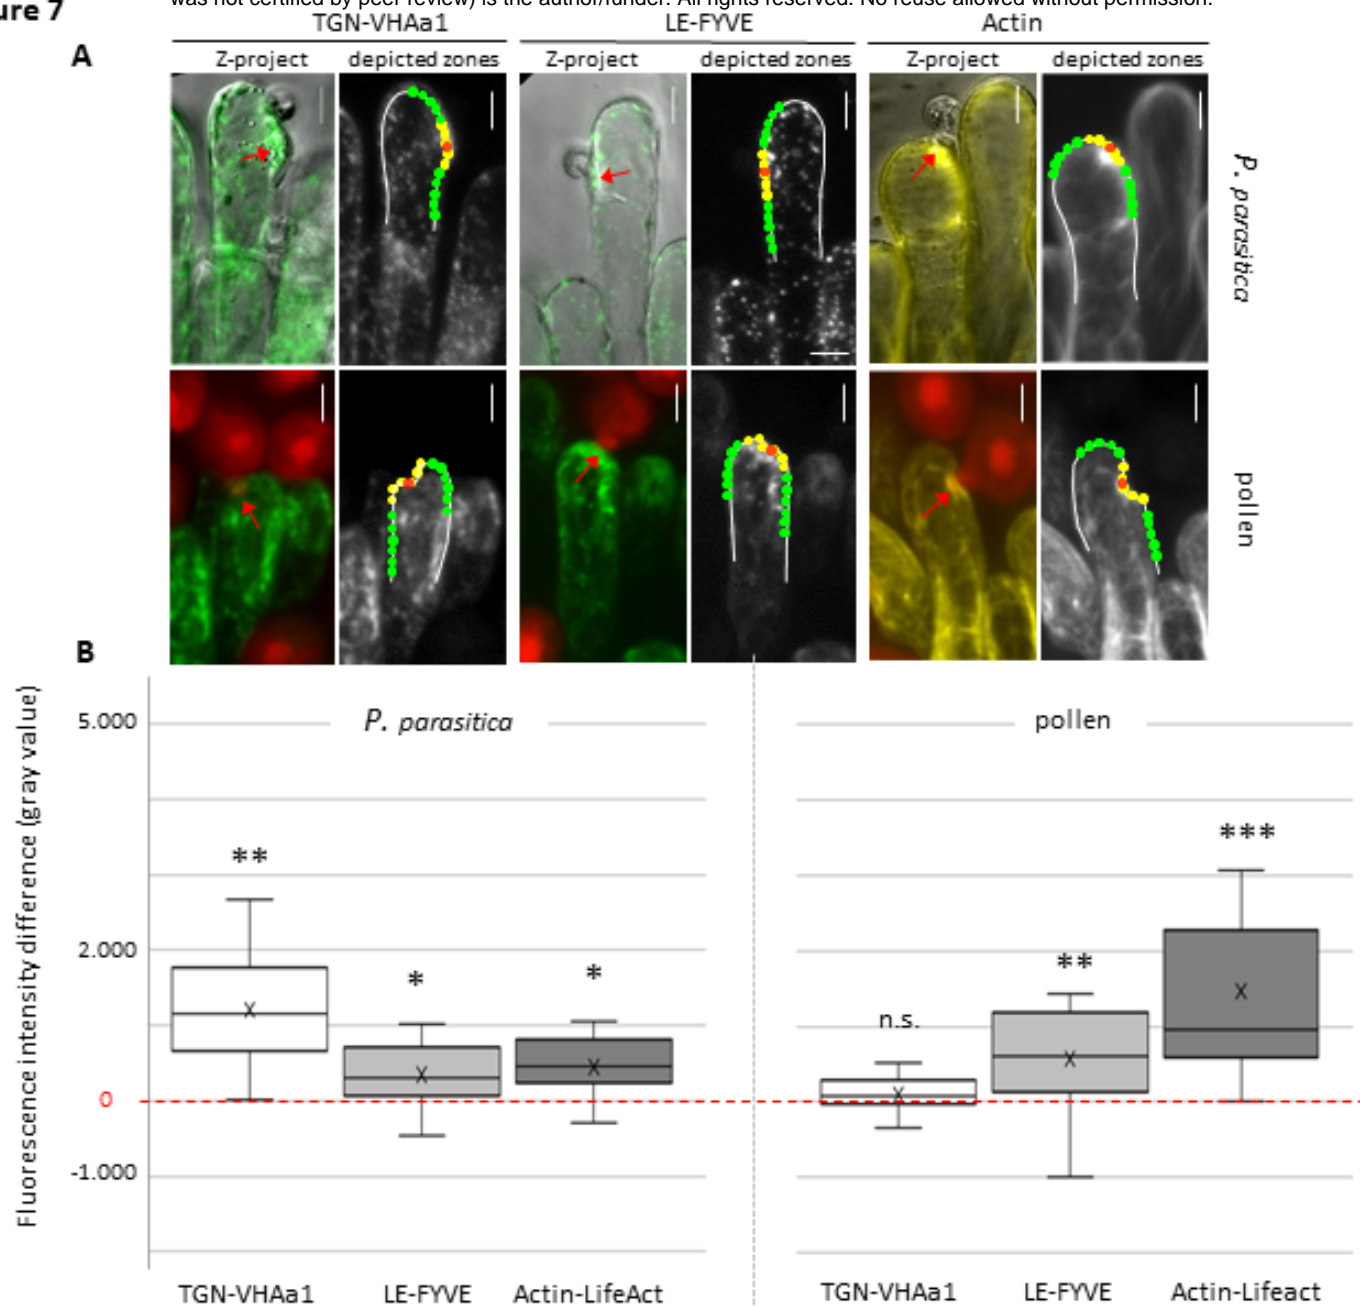

**Figure 7.** The pathogen and pollen tube trigger both similar and different subcellular rearrangements upon penetration of stigmatic cells.

A, Stigmatic cells from fluorescent marker lines for the trans Golgi network (TGN; TGN-VHAA1), the late endosome (LE/MVB; LE-Fyve), and the actin network (Actin-Lifeact) were infected with *P. parasitica* or pollinated. CLSM at one hai or 30 map allowed to visualize the papillae (green or yellow fluorescence) and the invader (bright field for *P. parasitica*, red fluorescence for pollen). The papilla periphery was manually outlined on the obtained images (white lines), and the Fiji macro automatically depicted two zones, (i) a contact zone (yellow circles) including the invader entry point (red arrow/red circle), and (ii) a surrounding zone (green circles). Fluorescence intensities (gray values) were automatically measured in each circle. Bars represent 10  $\mu$ m. B, Quantification of fluorescence intensity differences between zones (i) and (ii). For each interaction, 15 stigmatic cells on at least four independent stigma were analyzed. In the plots, the cross corresponds to the mean value. Statistical analysis of fluorescence intensity was based on a paired T-test. \* pVal<0,05; \*\* pVal<0,005; \*\*\* pVal<0,000.5; n.s., not significant. Detailed measurements are shown on supplemental Figures S2 to S5, S7 and S8.



## Figure 8

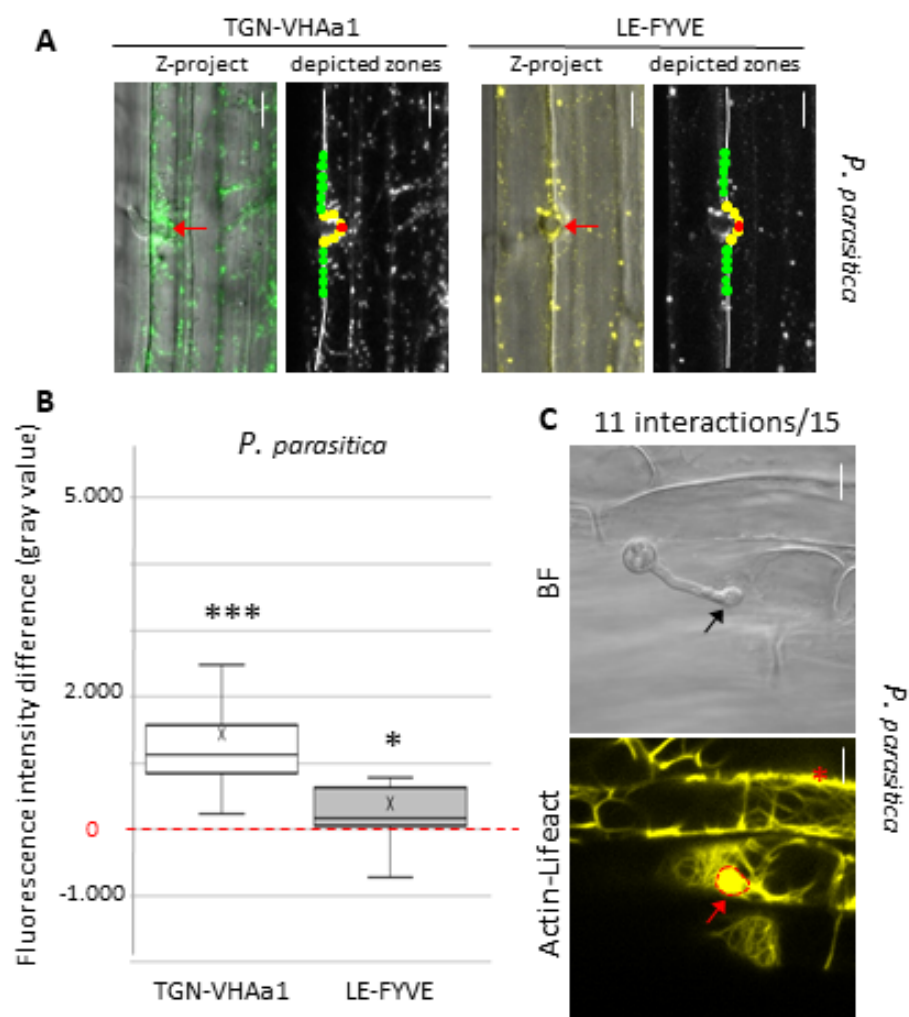

**Figure 8.** *P. parasitica* triggers reorganization of subcellular components in root cells.

Roots from fluorescent marker lines for the trans Golgi network (TGN; VHAa1), the late endosome (LE/MVB; 2xFyve), and the actin network (Actin; LifeAct) were infected with *P. parasitica* and analyzed by CLSM at one hai. A, For the TGN and LE marker lines, fluorescence was quantified using the Fiji macro as described in Figure 7 to determine fluorescence differences between contact zones and surrounding zones B, Quantification of fluorescence differences. For each interaction, 15 root cells on at least 10 independent roots were analyzed. In the plots, the cross corresponds to the mean value. Statistical analysis of fluorescence intensity was based on a paired T-test; \* pVal<0,05; \*\*\* pVal<0,0005. Detailed measurements are shown on supplemental Figures S9 and S10. C, The Fiji macro was not applicable to quantify actin fluorescence, because the high concentration of actin filaments at the cortical region (asterisk) distorted the quantification of fluorescence. We thus visually determined actin focalization when a fluorescence patch (red arrow, delimited by a red dashed line) was clearly visible at the contact site with the penetrating hyphae (black arrow). Among 15 root cells on 12 independent roots we determined a frequency of 11/15 events of actin focalization at penetration sites (see Supplemental Figure S12). BF, bright field. Bars represent 10  $\mu$ m.

## Parsed Citations

**Andargie M, Li J (2016) Arabidopsis thaliana: A Model Host Plant to Study Plant–Pathogen Interaction Using Rice False Smut Isolates of Ustilaginoidea virens. *Frontiers in Plant Science* 7:**

Google Scholar: [Author Only](#) [Title Only](#) [Author and Title](#)

**Aniento F, Sánchez de Medina Hernández V, Dagdas Y, Rojas-Pierce M, Russinova E (2022) Molecular mechanisms of endomembrane trafficking in plants. *The Plant Cell* 34: 146–173**

Google Scholar: [Author Only](#) [Title Only](#) [Author and Title](#)

**Attard A, Evangelisti E, Kebdani-Minet N, Panabières F, Deleury E, Maggio C, Ponchet M, Gourgues M (2014) Transcriptome dynamics of Arabidopsis thaliana root penetration by the oomycete pathogen Phytophthora parasitica. *BMC Genomics* 15: 538**

Google Scholar: [Author Only](#) [Title Only](#) [Author and Title](#)

**Attard A, Gourgues M, Callemeyn-Torre N, Keller H (2010) The immediate activation of defense responses in Arabidopsis roots is not sufficient to prevent Phytophthora parasitica infection. *New Phytologist* 187: 449–460**

Google Scholar: [Author Only](#) [Title Only](#) [Author and Title](#)

**Bassani I, Larousse M, Tran QD, Attard A, Galiana E (2020) Phytophthora zoospores: From perception of environmental signals to inoculum formation on the host-root surface. *Comput Struct Biotechnol J* 18: 3766–3773**

Google Scholar: [Author Only](#) [Title Only](#) [Author and Title](#)

**Bircher U, Hohl HR (1997) Environmental signalling during induction of appressorium formation in Phytophthora. *Mycological Research* 101: 395–402**

Google Scholar: [Author Only](#) [Title Only](#) [Author and Title](#)

**Blackman LM, Cullerne DP, Hardham AR (2014) Bioinformatic characterisation of genes encoding cell wall degrading enzymes in the Phytophthora parasitica genome. *BMC Genomics* 15: 785**

Google Scholar: [Author Only](#) [Title Only](#) [Author and Title](#)

**Boevink PC, Birch PRJ, Turnbull D, Whisson SC (2020) Devastating intimacy: the cell biology of plant–Phytophthora interactions. *New Phytologist* 228: 445–458**

Google Scholar: [Author Only](#) [Title Only](#) [Author and Title](#)

**Bozkurt TO, Belhaj K, Dagdas YF, Chaparro-Garcia A, Wu C-H, Cano LM, Kamoun S (2015) Rerouting of Plant Late Endocytic Trafficking Toward a Pathogen Interface: Rerouting of Endocytic Pathway to Pathogen Interface. *Traffic* 16: 204–226**

Google Scholar: [Author Only](#) [Title Only](#) [Author and Title](#)

**Branco R, Pearsall E-J, Rundle CA, White RG, Bradby JE, Hardham AR (2017) Quantifying the plant actin cytoskeleton response to applied pressure using nanoindentation. *Protoplasma* 254: 1127–1137**

Google Scholar: [Author Only](#) [Title Only](#) [Author and Title](#)

**Brewer HC, Hammond-Kosack KE (2015) Host to a Stranger: Arabidopsis and Fusarium Ear Blight. *Trends in Plant Science* 20: 651–663**

Google Scholar: [Author Only](#) [Title Only](#) [Author and Title](#)

**Chapman LA, Goring DR (2010) Pollen-pistil interactions regulating successful fertilization in the Brassicaceae. *Journal of Experimental Botany* 61: 1987–1999**

Google Scholar: [Author Only](#) [Title Only](#) [Author and Title](#)

**Clarke D, Morley E, Robert D (2017) The bee, the flower, and the electric field: electric ecology and aerial electroreception. *J Comp Physiol A* 203: 737–748**

Google Scholar: [Author Only](#) [Title Only](#) [Author and Title](#)

**Dettmer J (2006) Vacuolar H<sup>+</sup>-ATPase Activity Is Required for Endocytic and Secretory Trafficking in Arabidopsis. *THE PLANT CELL ONLINE* 18: 715–730**

Google Scholar: [Author Only](#) [Title Only](#) [Author and Title](#)

**Doucet J, Lee HK, Goring DR (2016) Pollen Acceptance or Rejection: A Tale of Two Pathways. *Trends in Plant Science* 21: 1058–1067**

Google Scholar: [Author Only](#) [Title Only](#) [Author and Title](#)

**Doumane M, Lebecq A, Colin L, Fangain A, Stevens FD, Bareille J, Hamant O, Belkhadir Y, Munnik T, Jaillais Y, et al (2021) Inducible depletion of PI(4,5)P2 by the synthetic iDePP system in Arabidopsis. *Nat Plants* 7: 587–597**

Google Scholar: [Author Only](#) [Title Only](#) [Author and Title](#)

**Gaulin E, Jauneau A, Villalba F, Rickauer M, Esquerré-Tugayé M-T, Bottin A (2002) The CBEL glycoprotein of Phytophthora parasitica var- nicotianae is involved in cell wall deposition and adhesion to cellulosic substrates. *Journal of Cell Science* 115: 4565–4575**

Google Scholar: [Author Only](#) [Title Only](#) [Author and Title](#)

**Geitmann A, Nebenführ A (2015) Navigating the plant cell: intracellular transport logistics in the green kingdom. MBoC 26: 3373–3378**

Google Scholar: [Author Only](#) [Title Only](#) [Author and Title](#)

**Hardham AR (2007) Cell biology of plant?oomycete interactions. Cellular Microbiology 9: 31–39**

Google Scholar: [Author Only](#) [Title Only](#) [Author and Title](#)

**Hardham AR, Takemoto D, White RG (2008) Rapid and dynamic subcellular reorganization following mechanical stimulation of Arabidopsis epidermal cells mimics responses to fungal and oomycete attack. BMC Plant Biology 8: 63**

Google Scholar: [Author Only](#) [Title Only](#) [Author and Title](#)

**Heizmann P, Luu DT, Dumas C (2000) Pollen-stigma adhesion in the Brassicaceae. Annals of Botany 85: 23–27**

Google Scholar: [Author Only](#) [Title Only](#) [Author and Title](#)

**Hiscock SJ, Allen AM (2008) Diverse cell signalling pathways regulate pollen-stigma interactions: the search for consensus. New Phytologist 179: 286–317**

Google Scholar: [Author Only](#) [Title Only](#) [Author and Title](#)

**Hok S, Allasia V, Andrio E, Naessens E, Ribes E, Panabières F, Attard A, Ris N, Clément M, Barlet X, et al (2014) The Receptor Kinase IMPAIRED OOMYCETE SUSCEPTIBILITY1 Attenuates Abscisic Acid Responses in Arabidopsis1[C][W]. Plant Physiol 166: 1506–1518**

Google Scholar: [Author Only](#) [Title Only](#) [Author and Title](#)

**Indriolo E, Safavian D, Goring DR (2014) The ARC1 E3 Ligase Promotes Two Different Self-Pollen Avoidance Traits in Arabidopsis. The Plant Cell 26: 1525–1543**

Google Scholar: [Author Only](#) [Title Only](#) [Author and Title](#)

**Iwano M, Shiba H, Matoba K, Miwa T, Funato M, Entani T, Nakayama P, Shimosato H, Takaoka A, Isogai A, et al (2007) Actin Dynamics in Papilla Cells of Brassica rapa during Self- and Cross-Pollination. PLANT PHYSIOLOGY 144: 72–81**

Google Scholar: [Author Only](#) [Title Only](#) [Author and Title](#)

**Jones K, Zhu J, Jenkinson CB, Kim DW, Pfeifer MA, Khang CH (2021) Disruption of the Interfacial Membrane Leads to Magnaporthe oryzae Effector Re-location and Lifestyle Switch During Rice Blast Disease. Front Cell Dev Biol 9: 681734**

Google Scholar: [Author Only](#) [Title Only](#) [Author and Title](#)

**Karimi M, Inzé D, Depicker A (2002) GATEWAY vectors for Agrobacterium-mediated plant transformation. Trends Plant Sci 7: 193–195**

Google Scholar: [Author Only](#) [Title Only](#) [Author and Title](#)

**Kasteel M, Ketelaar T, Govers F (2023) Fatal attraction: How Phytophthora zoospores find their host. Seminars in Cell & Developmental Biology. doi: 10.1016/j.semcdb.2023.01.014**

Google Scholar: [Author Only](#) [Title Only](#) [Author and Title](#)

**Kebdani N, Pieuchot L, Deleury E, Panabières F, Le Berre J-Y, Gourgues M (2010) Cellular and molecular characterization of Phytophthora parasitica appressorium-mediated penetration. New Phytologist 185: 248–257**

Google Scholar: [Author Only](#) [Title Only](#) [Author and Title](#)

**Kodera C, Just J, Da Rocha M, Larrieu A, Riglet L, Legrand J, Rozier F, Gaude T, Fobis-Loisy I (2021) The molecular signatures of compatible and incompatible pollination in Arabidopsis. BMC Genomics 22: 268**

Google Scholar: [Author Only](#) [Title Only](#) [Author and Title](#)

**Kubicek CP, Starr TL, Glass NL (2014) Plant Cell Wall–Degrading Enzymes and Their Secretion in Plant-Pathogenic Fungi. Annu Rev Phytopathol 52: 427–451**

Google Scholar: [Author Only](#) [Title Only](#) [Author and Title](#)

**Le Berre J-Y, Gourgues M, Samans B, Keller H, Panabières F, Attard A (2017) Transcriptome dynamic of Arabidopsis roots infected with Phytophthora parasitica identifies VQ29, a gene induced during the penetration and involved in the restriction of infection. PloS one 12: e0190341**

Google Scholar: [Author Only](#) [Title Only](#) [Author and Title](#)

**Liu C, Shen L, Xiao Y, Vyshefsky D, Peng C, Sun X, Liu Z, Cheng L, Zhang H, Han Z, et al (2021) Pollen PCP-B peptides unlock a stigma peptide–receptor kinase gating mechanism for pollination. Science 372: 171–175**

Google Scholar: [Author Only](#) [Title Only](#) [Author and Title](#)

**Lu Y, Zhang Y, Lian N, Li X (2023) Membrane Dynamics Regulated by Cytoskeleton in Plant Immunity. Int J Mol Sci 24: 6059**

Google Scholar: [Author Only](#) [Title Only](#) [Author and Title](#)

**Meng Y, Zhang Q, Ding W, Shan W (2014) Phytophthora parasitica : a model oomycete plant pathogen. Mycology 5: 43–51**

Google Scholar: [Author Only](#) [Title Only](#) [Author and Title](#)

**Mondragón-Palomino M, John-Arputharaj A, Pallmann M, Dresselhaus T (2017) Similarities between Reproductive and Immune**

**Pistil Transcriptomes of Arabidopsis Species. Plant Physiology 174: 1559–1575**

Google Scholar: [Author Only](#) [Title Only](#) [Author and Title](#)

**Nasrallah J (2005) Recognition and rejection of self in plant self-incompatibility: comparisons to animal histocompatibility. Trends in Immunology 26: 412–418**

Google Scholar: [Author Only](#) [Title Only](#) [Author and Title](#)

**Nelson BK, Cai X, Nebenführ A (2007) A multicolored set of in vivo organelle markers for co-localization studies in Arabidopsis and other plants: Fluorescent organelle markers. The Plant Journal 51: 1126–1136**

Google Scholar: [Author Only](#) [Title Only](#) [Author and Title](#)

**Oliveira-Garcia E, Valent B (2015) How eukaryotic filamentous pathogens evade plant recognition. Current Opinion in Microbiology 26: 92–101**

Google Scholar: [Author Only](#) [Title Only](#) [Author and Title](#)

**Qin L, Zhou Z, Li Q, Zhai C, Liu L, Quilichini TD, Gao P, Kessler SA, Jaillais Y, Datla R, et al (2020) Specific Recruitment of Phosphoinositide Species to the Plant-Pathogen Interfacial Membrane Underlies Arabidopsis Susceptibility to Fungal Infection. Plant Cell. doi: 10.1105/tpc.19.00970**

Google Scholar: [Author Only](#) [Title Only](#) [Author and Title](#)

**Riglet L, Rozier F, Kodera C, Bovio S, Sechet J, Fobis-Loisy I, Gaude T (2020) KATANIN-dependent mechanical properties of the stigmatic cell wall mediate the pollen tube path in Arabidopsis. eLife 9: e57282**

Google Scholar: [Author Only](#) [Title Only](#) [Author and Title](#)

**Robinson R, Solla-pura V, Couroux P, Sprott D, Ravensdale M, Routly E, Xing T, Robert LS (2021) The Brassica mature pollen and stigma proteomes: preparing to meet. The Plant Journal 107: 1546–1568**

Google Scholar: [Author Only](#) [Title Only](#) [Author and Title](#)

**Rotman N, Rozier F, Boavida L, Dumas C, Berger F, Faure J-E (2003) Female control of male gamete delivery during fertilization in Arabidopsis thaliana. Current Biology 13: 432–436**

Google Scholar: [Author Only](#) [Title Only](#) [Author and Title](#)

**Rozier F, Riglet L, Kodera C, Bayle V, Durand E, Schnabel J, Gaude T, Fobis-Loisy I (2020) Live-cell imaging of early events following pollen perception in self-incompatible Arabidopsis thaliana. J Exp Bot 71: 2513–2526**

Google Scholar: [Author Only](#) [Title Only](#) [Author and Title](#)

**Ruano G, Scheuring D (2020) Plant Cells under Attack: Unconventional Endomembrane Trafficking during Plant Defense. Plants 9: 389**

Google Scholar: [Author Only](#) [Title Only](#) [Author and Title](#)

**Ryder LS, Cruz-Mireles N, Molinari C, Eisermann I, Eseola AB, Talbot NJ (2022) The appressorium at a glance. Journal of Cell Science 135: jcs259857**

Google Scholar: [Author Only](#) [Title Only](#) [Author and Title](#)

**Safavian D, Goring DR (2013) Secretory Activity Is Rapidly Induced in Stigmatic Papillae by Compatible Pollen, but Inhibited for Self-Incompatible Pollen in the Brassicaceae. PLoS ONE 8: e84286**

Google Scholar: [Author Only](#) [Title Only](#) [Author and Title](#)

**Samuel MA, Chong YT, Haasen KE, Aldea-Brydges MG, Stone SL, Goring DR (2009) Cellular Pathways Regulating Responses to Compatible and Self-Incompatible Pollen in Brassica and Arabidopsis Stigmas Intersect at Exo70A1, a Putative Component of the Exocyst Complex. THE PLANT CELL ONLINE 21: 2655–2671**

Google Scholar: [Author Only](#) [Title Only](#) [Author and Title](#)

**Samuel MA, Tang W, Jamshed M, Northey J, Patel D, Smith D, Siu KWM, Muench DG, Wang Z-Y, Goring DR (2011) Proteomic Analysis of Brassica Stigmatic Proteins Following the Self-incompatibility Reaction Reveals a Role for Microtubule Dynamics During Pollen Responses. Molecular & Cellular Proteomics 10: M111.011338-M111.011338**

Google Scholar: [Author Only](#) [Title Only](#) [Author and Title](#)

**Sanati Nezhad A, Geitmann A (2013) The cellular mechanics of an invasive lifestyle. Journal of Experimental Botany 64: 4709–4728**

Google Scholar: [Author Only](#) [Title Only](#) [Author and Title](#)

**Schindelin J, Arganda-Carreras I, Frise E, Kaynig V, Longair M, Pietzsch T, Preibisch S, Rueden C, Saalfeld S, Schmid B, et al (2012) Fiji: an open-source platform for biological-image analysis. Nat Methods 9: 676–682**

Google Scholar: [Author Only](#) [Title Only](#) [Author and Title](#)

**Schreiber L (2010) Transport barriers made of cutin, suberin and associated waxes. Trends in Plant Science 15: 546–553**

Google Scholar: [Author Only](#) [Title Only](#) [Author and Title](#)

**Simon MLA, Platre MP, Assil S, van Wijk R, Chen WY, Chory J, Dreux M, Munnik T, Jaillais Y (2014) A multi-colour/multi-affinity marker set to visualize phosphoinositide dynamics in Arabidopsis. The Plant Journal 77: 322–337**

Google Scholar: [Author Only](#) [Title Only](#) [Author and Title](#)

**Smyth DR, Bowman JL, Meyerowitz EM (1990) Early flower development in Arabidopsis. The Plant Cell 2: 755–767**

Google Scholar: [Author Only](#) [Title Only](#) [Author and Title](#)

**Stegmann M, Monaghan J, Smakowska-Luzan E, Rovenich H, Lehner A, Holton N, Belkhadir Y, Zipfel C (2017) The receptor kinase FER is a RALF-regulated scaffold controlling plant immune signaling. Science 355: 287–289**

Google Scholar: [Author Only](#) [Title Only](#) [Author and Title](#)

**Takemoto D, Jones DA, Hardham AR (2003) GFP-tagging of cell components reveals the dynamics of subcellular re-organization in response to infection of Arabidopsis by oomycete pathogens. The Plant Journal 33: 775–792**

Google Scholar: [Author Only](#) [Title Only](#) [Author and Title](#)

**Van West P van, Morris BM, Reid B, Appiah AA, Osborne MC, Campbell TA, Shepherd SJ, Gow NAR (2002) Oomycete plant pathogens use electric fields to target roots. Molecular plant-microbe interactions 15: 790–798**

Google Scholar: [Author Only](#) [Title Only](#) [Author and Title](#)

**Yi M, Valent B (2013) Communication Between Filamentous Pathogens and Plants at the Biotrophic Interface. Annual Review of Phytopathology 51: 587–611**

Google Scholar: [Author Only](#) [Title Only](#) [Author and Title](#)
